1 **Coronavirus GenBrowser for monitoring the transmission and**  
2 **evolution of SARS-CoV-2**

3

4 Dalang Yu<sup>1,7,†</sup>, Xiao Yang<sup>1,5,†</sup>, Bixia Tang<sup>2,†</sup>, Yi-Hsuan Pan<sup>3,†</sup>, Jianing Yang<sup>1,7,†</sup>, Junwei  
5 Zhu<sup>2,†</sup>, Guangya Duan<sup>2,7</sup>, Zi-Qian Hao<sup>1,7</sup>, Hailong Mu<sup>1</sup>, Long Dai<sup>1,5</sup>, Wangjie Hu<sup>1,7</sup>,  
6 Mochen Zhang<sup>2,7</sup>, Ying Cui<sup>2,7</sup>, Tong Jin<sup>2,7</sup>, Cui-Ping Li<sup>2</sup>, Lina Ma<sup>2</sup>, Language  
7 translation team<sup>6</sup>, Xiao Su<sup>4</sup>, Guoqing Zhang<sup>1,7,\*</sup>, Wenming Zhao<sup>2,7,\*</sup>, Haipeng Li<sup>1,7,8,\*</sup>

8

9 <sup>1,‡</sup>Bio-Med Big Data Center, CAS Key Laboratory of Computational Biology,  
10 Shanghai Institute of Nutrition and Health, Chinese Academy of Sciences,  
11 Shanghai 200031, China.

12 <sup>2,‡</sup>National Genomics Data Center, Beijing Institute of Genomics (China National  
13 Center for Bioinformatics), Chinese Academy of Sciences, Beijing 100101,  
14 China.

15 <sup>3</sup>Key Laboratory of Brain Functional Genomics of Ministry of Education, School of  
16 Life Science, East China Normal University, Shanghai 200062, China.

17 <sup>4</sup>Institut Pasteur of Shanghai, Chinese Academy of Sciences, Shanghai 200031,  
18 China.

19 <sup>5</sup>Shanghai Shenyou Biotechnology Co. LTD, Shanghai 201315, China.

20 <sup>6</sup>Beijing Language and Culture University, Beijing 100083, China.

21 <sup>7</sup>University of Chinese Academy of Sciences, Chinese Academy of Sciences, Beijing  
22 100101, China.

23 <sup>8</sup>Center for Excellence in Animal Evolution and Genetics, Chinese Academy of  
24 Sciences, Kunming 650223, China.

25

26 <sup>†</sup>These authors contributed equally.

27 <sup>‡</sup>These institutes contributed equally.

28

29 **\*Corresponding authors:** gqzhang@picb.ac.cn; zhaowm@big.ac.cn;  
30 lihaipeng@picb.ac.cn

31

32

33 **Abstract:** A large volume of SARS-CoV-2 genomic data has accumulated. To timely  
34 analyze and visualize the exponentially increasing viral genomic sequences, we  
35 developed the Coronavirus GenBrowser (CGB) based on the framework of distributed  
36 genome alignments and the evolutionary tree built on an existing subtree. All 98,496  
37 internal nodes were named by CGB binary nomenclature. Among the 330,942  
38 high-quality SARS-CoV-2 genomic sequences analyzed, 253,798 mutations and 971  
39 mutation cold spots were identified. This analysis also revealed a strain dated early  
40 March 2020 causing an outbreak in Beijing after three months of dormancy. Three  
41 prevalent European variants were found to have no mutations in three months.  
42 Another strain with S:D614G was found to have 671 identical descendants spreading  
43 in six continents between February 2020 and January 2021. Mutation-dormant strains  
44 provide evidences of cold-chain related transmission. Results of this study show that  
45 CGB is an efficient platform for monitoring the dynamics of SARS-CoV-2  
46 transmission.

47

48 **Key words**

49 Coronavirus GenBrowser; SARS-CoV-2; cold-chain related transmission;  
50 mutation-dormant strains

51

52 **Main Text:** Severe acute respiratory syndrome coronavirus 2 (SARS-CoV-2) (1-3) has  
53 infected more than 116 million people, and more than 2.5 million people have died  
54 from COVID-19. Several web browsers have been developed to track the COVID-19  
55 pandemic. The browser of the Johns Hopkins Coronavirus Resource Center displays  
56 global and regional COVID-19 status, including numbers of confirmed cases, deaths,  
57 tests, hospitalizations, and vaccinations (<https://coronavirus.jhu.edu/>). The COVID-3D  
58 browser, developed by the University of Melbourne, shows the three-dimensional  
59 structures of various wild-type and mutant proteins of SARS-CoV-2 based on their  
60 nucleotide sequences (4). The UCSC SARS-CoV-2 Genome Browser is derived from  
61 the well-established UCSC genome-browser for visualization of nucleotide and protein  
62 sequences, sequence conservations, potential epitopes for production of antibodies,  
63 primers for RT-PCR and sequencing, and many other properties of specific parts of  
64 wild-type and variants of SARS-CoV-2 (5). The WashU Virus Genome Browser  
65 provides Nextstrain-based phylogenetic-tree view and genomic-coordinate,  
66 track-based view of genomic features of viruses (6). It also has many functions similar  
67 to those of the UCSC SARS-CoV-2 Genome Browser such as visualization of sequence  
68 variations, genomic sites for diagnostic tests, and immunogenic epitopes.

69

70 Nextstrain is a browser for real-time tracking of pathogen evolution. It hosts tools for  
71 phylodynamic analysis of genomic sequences of pathogens of both endemic and  
72 pandemic diseases. Nextstrain has allowed analysis of genomic sequences of  
73 approximately 4,000 strains of SARS-CoV-2 and investigation of its evolution (7). As  
74 more than one million SARS-CoV-2 genomic sequences have been deposited in  
75 public databases, such as National Center for Biotechnology Information (NCBI)  
76 GenBank (8) and Global Initiative on Sharing All Influenza Data (GISAID) (9, 10),  
77 analysis of these data has far exceeded the capacity of Nextstrain. New approaches are  
78 needed to accomplish this task. Therefore, we developed the Coronavirus  
79 GenBrowser (CGB).

80

81 To allow timely analysis of a large number of SAR-CoV-2 genomic sequences, we first  
82 solved the problem that all viral genomic sequences have to be re-aligned when  
83 nucleotide sequences of new genomes become available. This is extremely time  
84 consuming. With the distributed alignment system (Figure 1), we dramatically reduced  
85 the total time required for the alignment. We also built the evolutionary tree on the  
86 existing tree with new genomic data in order to reduce the complexity of tree  
87 construction. With these modifications, hundreds of thousands of SARS-CoV-2  
88 genomes can be timely analyzed with data easily shared and visualized (Figure 1).

89

90 For genomic sequence alignments, high quality SARS-CoV-2 genomic sequences were  
91 obtained from the 2019nCoV database (11, 12), which is an integrated resource based  
92 on GenBank, GISAID (9, 10), China National GeneBank DataBase (CNCDB) (13),  
93 the Genome Warehouse (GWH) (14), and the National Microbiology Data Center  
94 (NMDC, <https://nmcdc.cn/>). The sequences were aligned (15) to that of the reference  
95 genome (3) and presented as distributed alignments. Genomic sequences of bat  
96 coronavirus RaTG13 (16), pangolin coronavirus PCoV-GX-P1E (17), and  
97 SARS-CoV-2 strains collected before 31 January, 2020 were jointly used to identify  
98 ancestral alleles of SARS-CoV-2. Mutations in strains of each branch of the  
99 evolutionary tree were indicated according to the principle of parsimony (18). A  
100 highly effective maximum-likelihood method (TreeTime) (19) was used to determine  
101 the dates of internal nodes with very minor revisions.

102

103 CGB is frequently updated. By analyzing 330,942 high quality SARS-CoV-2 genomic  
104 sequences, 253,798 (recurrent) mutations were identified. With sliding window  
105 analysis, 971 mutation cold spots were found with a false discovery rate (FDR)  
106 corrected  $P$ -value  $< 0.01$  (Figure S5, Supplemental excel file). The coldest spot is  
107 located in ORF1a, which encodes nsp3 phosphoesterase (nucleotides 7,394 – 7,419)  
108 (FDR corrected  $P$ -value =  $4.28 \times 10^{-29}$ ). These mutation cold spots may be key  
109 functional elements of SARS-CoV-2 and can potentially be used for vaccine  
110 development and targets for detection.

111

112 The genome-wide mutation rate of coronaviruses has been determined to be  $10^{-4}$  –  
113  $10^{-2}$  per nucleotide per year (20). As this range of mutation rate is too wide, we  
114 decided to estimate more precisely the genome-wide mutation rate ( $\mu$ ) of SARS-CoV-2  
115 and determined that  $\mu = 6.8017 \times 10^{-4}$  per nucleotide per year (95% confidence  
116 interval: 5.4262 to  $8.2721 \times 10^{-4}$ ). The estimated  $\mu$  was lower than that of other  
117 coronaviruses, such as SARS-CoV ( $0.80$  to  $2.38 \times 10^{-3}$  per nucleotide per year) (20)  
118 and MERS-CoV ( $1.12 \times 10^{-3}$  per nucleotide per year) (21). It was slightly lower than  
119 that determined by other investigators ( $9.90 \times 10^{-4}$  per nucleotide per year) (22).

120 Various mutation rates were found in different regions of the SARS-CoV-2 genome.

121 The mutation rate of each gene is shown in Table S1.

122

123 Similar to Nextstrain (7), the pre-analyzed genomic data of SARS-CoV-2 variants and  
124 the associated metadata on CGB are shared with the general public. The size of  
125 distributed alignments is 9,498 Mb for the high-quality 330,942 SARS-CoV-2 genomic

126 sequences. The tree-based data format allows the compression ratio to reach 2,499:1,  
127 meaning that the size of compressed core file containing pre-analyzed genomic data  
128 and associated metadata is as small as 3.80 Mb (Figure 1). This approach ensures  
129 low-latency access to the data and enables fast sharing and re-analysis of a large  
130 number of SARS-CoV-2 genomic variants.

131

132 To visualize, search, and filter the results of genomic analysis, both desktop standalone  
133 and web-based user-interface of CGB were developed. Similar to the UCSC  
134 SARS-CoV-2 Genome Browser (5) and the WashU Virus Genome Browser (6), six  
135 genomic-coordinate annotated tracks were developed to show genome structure and  
136 key domains, allele frequencies, sequence similarity, multi-coronavirus genome  
137 alignment, and primer sets for detection of various SARS-CoV-2 strains (Figure S11).  
138 To efficiently visualize the results of genomic analysis, movie-making ability was  
139 implemented for painting the evolutionary tree, and only elements shown on the screen  
140 and visible to the user would be painted. This design makes the visualization process  
141 highly efficient, and the evolutionary tree of more than one million strains can be  
142 visualized simultaneously.

143

144 CGB detects on-going positive selection based on S-shaped frequency trajectory of a  
145 selected allele (Figures S18, S19). It has been shown that the SARS-CoV-2 variant  
146 with G614 spike protein has a fitness advantage (23). Our analysis using CGB  
147 confirmed this finding even when the G614 frequency was very low ( $< 10\%$ ) (Figure  
148 2), indicating that CGB can detect putative advantageous variants before they become  
149 widely spread. GCB also predicted an increase in the frequency of ORF1a:SGF3675-  
150 deletion of the B.1.1.7 lineage (24) (Figure 2), suggesting that variants with the deletion  
151 may be advantageous. ORF1a:SGF3675- is the last non-synonymous mutation  
152 occurred on the B.1.1.7 lineage (Figure S15). As an increase in mutation frequency  
153 could be due to sampling bias and epidemiological factors (23), putative advantageous  
154 variants should be closely monitored.

155

156 Using CGB, we analyzed branch-specific accelerated evolution of SARS-CoV-2 and  
157 found that 246 internal branches of the evolutionary tree (FDR corrected  $P < 0.05$ ,  
158 Supplemental excel file) had significantly more mutations. All evolution-accelerated  
159 variants were not found to spread significantly faster than other variants during the  
160 same period of time as the majority ( $168/225 = 74.6\%$ ) of these variants had  
161 relatively fewer descendants. This observation suggests that these variants are not

162 highly contagious. It is likely that these evolution-accelerated variants were evolved  
163 neutrally instead of adaptively.

164

165 CGB is also an efficient platform to investigate local and global transmission of  
166 COVID-19 (Figure 3). There was an outbreak in Qingdao, China (25) after two dock  
167 workers were found to have asymptomatic infections on 24 September, 2020. CGB  
168 lineage tracing revealed that the sequence of a sample collected from the outer  
169 packaging of cold-chain products is identical to that of the most recent common  
170 ancestor of the two strains isolated from the two dock workers (Figure 3B), suggesting  
171 that infection of these two individuals was cold-chain related.

172

173 CGB lineage tracing also revealed the difficulty in controlling COVID-19 pandemic.  
174 There was an outbreak in Xinfadi, Beijing, China (26, 27). The sequences of two  
175 isolates (Beijing/IVDC-02-06 and Beijing/BJ0617-01-Y), collected from two Xinfadi  
176 cases on 11 June and 14 June, 2020, were found to be identical to the sequence of the  
177 variant (CGB4268.5142) (Figure 3C) dated 6 March, 2020 (95% CI: 28 February – 17  
178 March, 2020). This variant was found to spread to Taiwan, India, Czech Republic,  
179 England, Denmark, and Colombia and caused the outbreak in Beijing three months  
180 later. It was also detected in the United States (NY-Wadsworth-21013812-01/2020)  
181 on 18 December, 2020. These two Xinfadi strains were found to evolve significantly  
182 slowly ( $P = 0.0043$  and  $0.0051$ , respectively) because no mutations were detected  
183 between March and June 2020, consistent with the hypothesis of cold-chain related  
184 transmission (27).

185

186 CGB is a powerful tool for identification of global and regional transmission of  
187 mutation-dormant strains as it can determine whether the mutation rate of a specific  
188 strain is significantly lower than the average mutation rate of the entire set of strains.  
189 This lineage-specific reduced mutation rate could be due to a long period of dormancy  
190 caused by the yet to be confirmed cold-chain preservation or other reasons. Among the  
191 330,942 SARS-CoV-2 strains, 7,534 strains were found to evolve significantly slowly  
192 (FDR corrected  $P = 9.68 \times 10^{-9} \sim 0.04$ , Supplemental excel file) and did not mutate  
193 in 100 days. In addition, three closely related variants were found to have no  
194 mutations in 3 months before their descendants were found to widely spread in  
195 Europe in late July 2020 (Figure 4A). Another variant with C3037T, A23403G  
196 (S:D614G), C14408T (ORF1b:P314L), and C241T, emerged in early December 2019.  
197 This variant had 671 identical descendants spreading in six continents between  
198 February 2020 and January 2021, indicating that it has no additional mutations in one

199 year (Figure 4B). The most (582/671 = 86.7%) of the descendants were found in  
200 Europe and North America. These results (Figures 3 and 4) suggest that the  
201 transmission of mutation-dormant variants also plays a major role in COVID-19  
202 pandemic.

203

204 All timely-updated data are freely available at <https://bigd.big.ac.cn/ncov/apis/>. The  
205 desktop standalone version (Figure S10A) provides the full function of CGB and has a  
206 plug-in module for the eGPS software (<http://www.egps-software.net/>) (28). Although  
207 the web-based CGB is a simplified version (<https://www.biosino.org/genbrowser/> and  
208 <https://bigd.big.ac.cn/genbrowser/>) and designed mainly for educational purpose, it  
209 provides a convenient way to access the data via a web browser, such as Google  
210 Chrome, Firefox, and Safari (Figure S10B, C). The web-based CGB package can be  
211 downloaded and reinstalled on any websites. Nine language versions (Chinese, English,  
212 German, Japanese, French, Italian, Portuguese, Russian, and Spanish) are available.

213

214

## 215 **References**

- 216 1. Zhu, N, Zhang, D, Wang, W, *et al.* A novel coronavirus from patients with pneumonia in China,  
217 2019. *N Engl J Med.* 2020; **382**(8): 727-33.
- 218 2. Lu, R, Zhao, X, Li, J, *et al.* Genomic characterisation and epidemiology of 2019 novel  
219 coronavirus: implications for virus origins and receptor binding. *Lancet.* 2020; **395**(10224):  
220 565-74.
- 221 3. Wu, F, Zhao, S, Yu, B, *et al.* A new coronavirus associated with human respiratory disease in  
222 China. *Nature.* 2020; **579**: 265-9.
- 223 4. Portelli, S, Olshansky, M, Rodrigues, CHM, *et al.* Exploring the structural distribution of genetic  
224 variation in SARS-CoV-2 with the COVID-3D online resource. *Nat Genet.* 2020; **52**(10):  
225 999-1001.
- 226 5. Fernandes, JD, Hinrichs, AS, Clawson, H, *et al.* The UCSC SARS-CoV-2 Genome Browser. *Nat*  
227 *Genet.* 2020; **52**: 986-91.
- 228 6. Flynn, JA, Purushotham, D, Choudhary, MNK, *et al.* Exploring the coronavirus pandemic with  
229 the WashU Virus Genome Browser. *Nat Genet.* 2020; **52**: 986-1001.
- 230 7. Hadfield, J, Megill, C, Bell, SM, *et al.* Nextstrain: real-time tracking of pathogen evolution.  
231 *Bioinformatics.* 2018; **34**(23): 4121-3.
- 232 8. Sayers, EW, Beck, J, Bolton, EE, *et al.* Database resources of the National Center for  
233 Biotechnology Information. *Nucleic Acids Res.* 2021; **49**: D10-D7.
- 234 9. Shu, YL, McCauley, J. GISAID: Global initiative on sharing all influenza data - from vision to  
235 reality. *Eurosurveillance.* 2017; **22**(13): 2-4.
- 236 10. Elbe, S, Buckland-Merrett, G. Data, disease and diplomacy: GISAID's innovative contribution to  
237 global health. *Glob Chall.* 2017; **1**(1): 33-46.
- 238 11. Zhao, W-M, Song, S-H, Chen, M-L, *et al.* The 2019 novel coronavirus resource. *Hereditas*

- 239 (Beijing). 2020; **42**(2): 212-21.
- 240 12. Gong, Z, Zhu, J-W, Li, C-P, *et al.* An online coronavirus analysis platform from the National  
241 Genomics Data Center. *Zool Res.* 2020; **41**(6): 705-8.
- 242 13. Chen, F, You, L, Yang, F, *et al.* CNGBdb: China National GeneBank DataBase. *Hereditas*  
243 (Beijing). 2020; **42**(8): 799-809.
- 244 14. Zhang, Z, Zhao, W, Xiao, J, *et al.* Database resources of the National Genomics Data Center in  
245 2020. *Nucleic Acids Res.* 2020; **48**(D1): D24-D33.
- 246 15. Katoh, K, Standley, DM. MAFFT multiple sequence alignment software version 7: Improvements  
247 in performance and usability. *Mol Biol Evol.* 2013; **30**(4): 772-80.
- 248 16. Zhou, P, Yang, X-L, Wang, X-G, *et al.* A pneumonia outbreak associated with a new coronavirus  
249 of probable bat origin. *Nature.* 2020; **579**: 270-3.
- 250 17. Lam, TT-Y, Jia, N, Zhang, Y-W, *et al.* Identifying SARS-CoV-2-related coronaviruses in Malayan  
251 pangolins. *Nature.* 2020; **583**(7815): 282-5.
- 252 18. Hartigan, JA. Minimum mutation fits to a given tree. *Biometrics.* 1973; **29**(1): 53-65.
- 253 19. Sagulenko, P, Puller, V, Neher, RA. TreeTime: Maximum-likelihood phylodynamic analysis. *Virus*  
254 *Evol.* 2018; **4**: vex042.
- 255 20. Zhao, ZM, Li, HP, Wu, XZ, *et al.* Moderate mutation rate in the SARS coronavirus genome and  
256 its implications. *BMC Evol Biol.* 2004; **4**: 21.
- 257 21. Cotten, M, Watson, SJ, Zumla, AI, *et al.* Spread, circulation, and evolution of the Middle East  
258 respiratory syndrome coronavirus. *Mbio.* 2014; **5**(1): e01062-13.
- 259 22. Nie, Q, Li, X, Chen, W, *et al.* Phylogenetic and phylodynamic analyses of SARS-CoV-2. *Virus*  
260 *Res.* 2020; **287**: 198098.
- 261 23. Korber, B, Fischer, WM, Gnanakaran, S, *et al.* Tracking changes in SARS-CoV-2 Spike: Evidence  
262 that D614G increases infectivity of the COVID-19 virus. *Cell.* 2020; **182**(4): 812-27.
- 263 24. Rambaut, A, Loman, N, Pybus, O, *et al.* Preliminary genomic characterisation of an emergent  
264 SARS-CoV-2 lineage in the UK defined by a novel set of spike mutations. *virological.org.* 2020:  
265 [https://virological.org/t/preliminary-genomic-characterisation-of-an-emergent-sars-cov-2-lineage-](https://virological.org/t/preliminary-genomic-characterisation-of-an-emergent-sars-cov-2-lineage-in-the-uk-defined-by-a-novel-set-of-spike-mutations/563)  
266 [in-the-uk-defined-by-a-novel-set-of-spike-mutations/563](https://virological.org/t/preliminary-genomic-characterisation-of-an-emergent-sars-cov-2-lineage-in-the-uk-defined-by-a-novel-set-of-spike-mutations/563).
- 267 25. Xing, Y, Wong, GWK, Ni, W, *et al.* Rapid response to an outbreak in Qingdao, China. *N Engl J*  
268 *Med.* 2020; **383**: e129.
- 269 26. Zhang, Y, Pan, Y, Zhao, X, *et al.* Genomic characterization of SARS-CoV-2 identified in a  
270 reemerging COVID-19 outbreak in Beijing's Xinfadi market in 2020. *Biosaf Health.* 2020; **2**:  
271 202-5.
- 272 27. Pang, X, Ren, L, Wu, S, *et al.* Cold-chain food contamination as the possible origin of Covid-19  
273 resurgence in Beijing. *Natl Sci Rev.* 2020; **7**: 1861-4.
- 274 28. Yu, D, Dong, L, Yan, F, *et al.* eGPS 1.0: comprehensive software for multi-omic and evolutionary  
275 analyses. *Natl Sci Rev.* 2019; **6**: 867-9.
- 276
- 277
- 278



279 **Acknowledgments**

280 We thank Ya-Ping Zhang for providing valuable advices and encouragement and the  
281 researchers who generated and deposited sequence data of SARS-CoV-2 in GISAID,  
282 GenBank, CNGBdb, GWH, and NMDC making this study possible.

283

284 **Funding**

285 This work was supported by a grant from the National Key Research and Development  
286 Project (No. 2020YFC0847000).

287

288 **Members of the language translation team**

289 German: Ning He<sup>6</sup>, Jing Lv<sup>6</sup>, Ting Peng<sup>6</sup>

290 Italian: Ting Zhou<sup>6</sup>, Nan Yang<sup>6</sup>, Siyi Hou<sup>6</sup>

291 Portuguese: Huang Li<sup>6</sup>, Jingxuan Yan<sup>6</sup>, Chenglin Zhu<sup>6</sup>, Wenjing Liu<sup>6</sup>

292 Russian: Yuhong Guan<sup>6</sup>, Huanxiao Song<sup>6</sup>

293 Spanish: Qin Zhou<sup>6</sup>, Han Gao<sup>6</sup>, Jinglan He<sup>6</sup>, Tiantian Li<sup>6</sup>, Ruiwen Fei<sup>6</sup>, Shumei Zhang<sup>6</sup>

294 French: Yuyuan Guo<sup>6</sup>

295

296 **Author contributions:** YHP, GQZ, WZ, and HL designed the study; DY, XY, BT,  
297 YHP, JY, JZ, GD, ZQH, HM, LD, GQZ, WZ, and HL wrote the code and developed  
298 CGB; DY, XY, BT, YHP, JY, JZ, GD, ZQH, WH, XS, GQZ, WZ, and HL acquired,  
299 analyzed, and interpreted the data; LM, MZ, YC, GD, TJ, and CL integrated and  
300 curated the source data; members of the language translation team translated CGB  
301 into multiple languages; DY, YHP, JY, JZ, GQZ, WZ, and HL wrote the manuscript.  
302 All authors have approved the submitted version.

303

304 **Competing interests:** The authors declare no competing interests.

305

306 **Data and materials availability:** The coronavirus genomic sequences used in this  
307 study were obtained from the 2019nCoV database (11). Timely updated data of  
308 genomic sequences of SARS-CoV-2 variants are shared with the general public at  
309 <https://bigd.big.ac.cn/ncov/apis/>. The free software (desktop and web-based versions)  
310 can be downloaded from <http://www.egps-software.net/>.

311

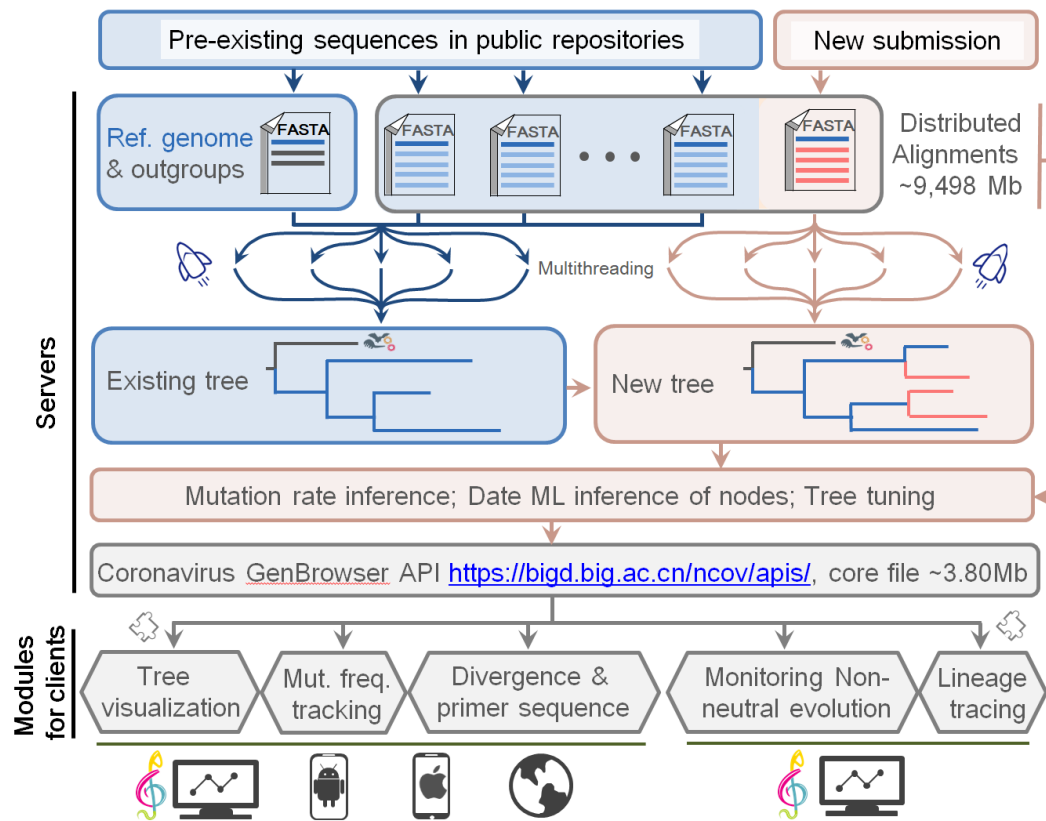

312

313

314 **Figure 1. Timely updates of SARS-CoV-2 genomic data and visualization**

315 **framework of Coronavirus GenBrowser.** The core file includes the pre-analyzed

316 genomic data of SARS-CoV-2 variants and the associated metadata. All

317 timely-updated data can be freely accessed at <https://bigd.big.ac.cn/ncov/apis/>.

318

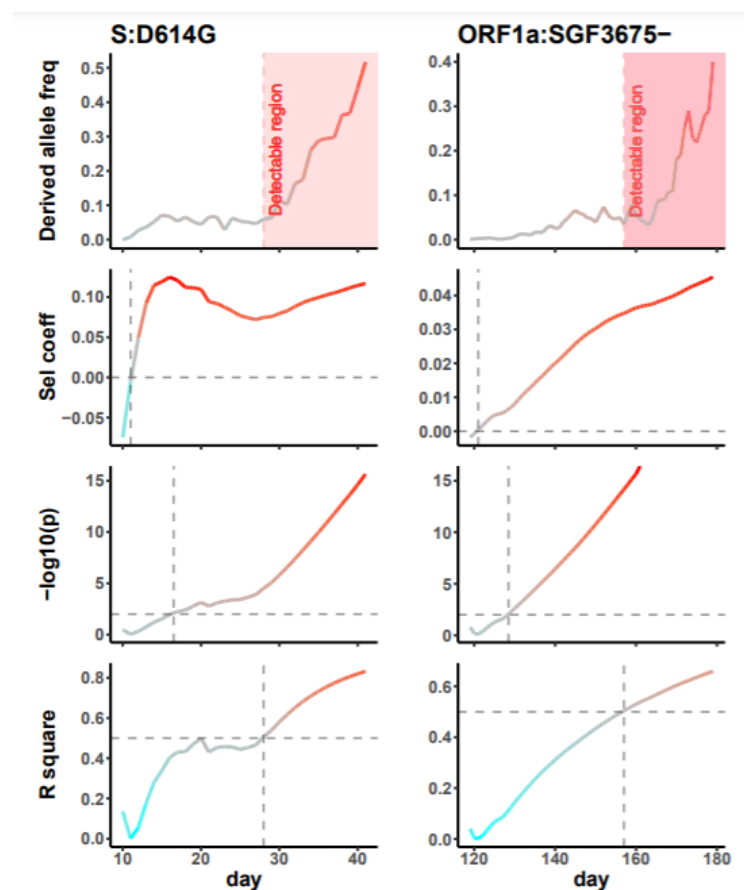

319

320 **Figure 2. Putative advantageous variants of SARS-CoV-2.** The  $x$ -axis displays  
321 number of days since the first appearance of derived allele in the global viral population.  
322 Predicted adaptation is marked in pink. Dashed gray crossings denote top right corners  
323 with a positive selection coefficient,  $p < 0.01$ , and  $R^2 > 50\%$ .

324

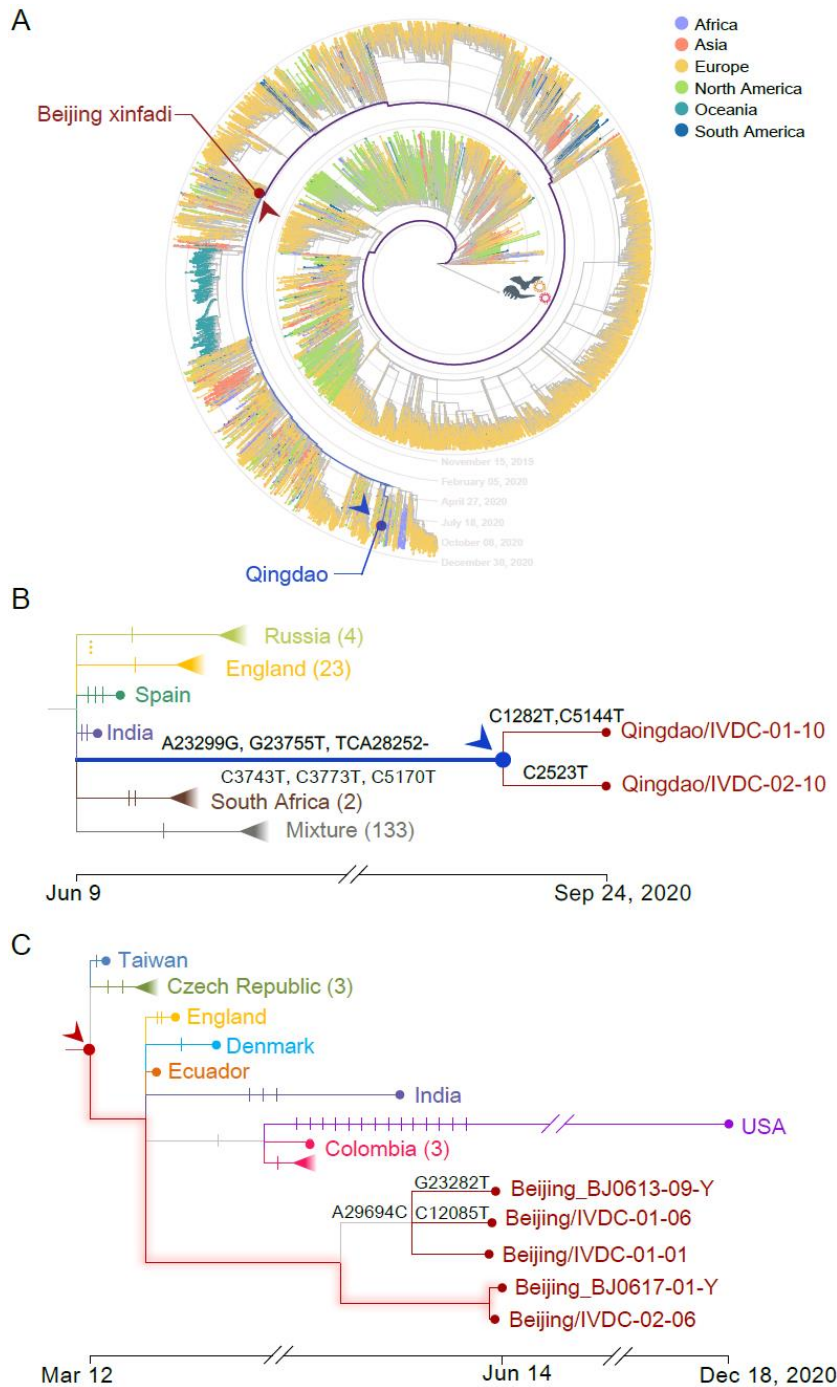

325  
326 **Figure 3. Global and zoom-in views of lineages associated with Qingdao and**  
327 **Beijing outbreaks.**

328 A) The lineages of traced targets are shown in blue and dark red lines.  
329 B) Qingdao/IVDC-01-10 and Qingdao/IVDC-02-10 were the two SARS-CoV-2  
330 strains collected on 24 September, 2020 from two dock workers in Qingdao,  
331 China. The query strain (env/Qingdao/IVDC-011-10) was found on an outer  
332 packaging of cold-chain products on 7 October, 2020. The environmental strain,  
333 marked with a blue solid circle with an arrowhead, was found to be identical to the  
334 most recent common ancestor of the two strains from the two dock workers. Each

335 notch of the branches represents a mutation. Mutations of the Qingdao strains are  
336 indicated.  
337 C) The ancestral viral strain found in early March 2020 is marked with a dark-red  
338 solid circle and an arrowhead. This strain is identical to the two strains  
339 (Beijing/IVDC-02-06 and Beijing/BJ0617-01-Y) collected from two Xinfadi cases  
340 on 11 June and 14 June, 2020. The branches with no mutations are highlighted.

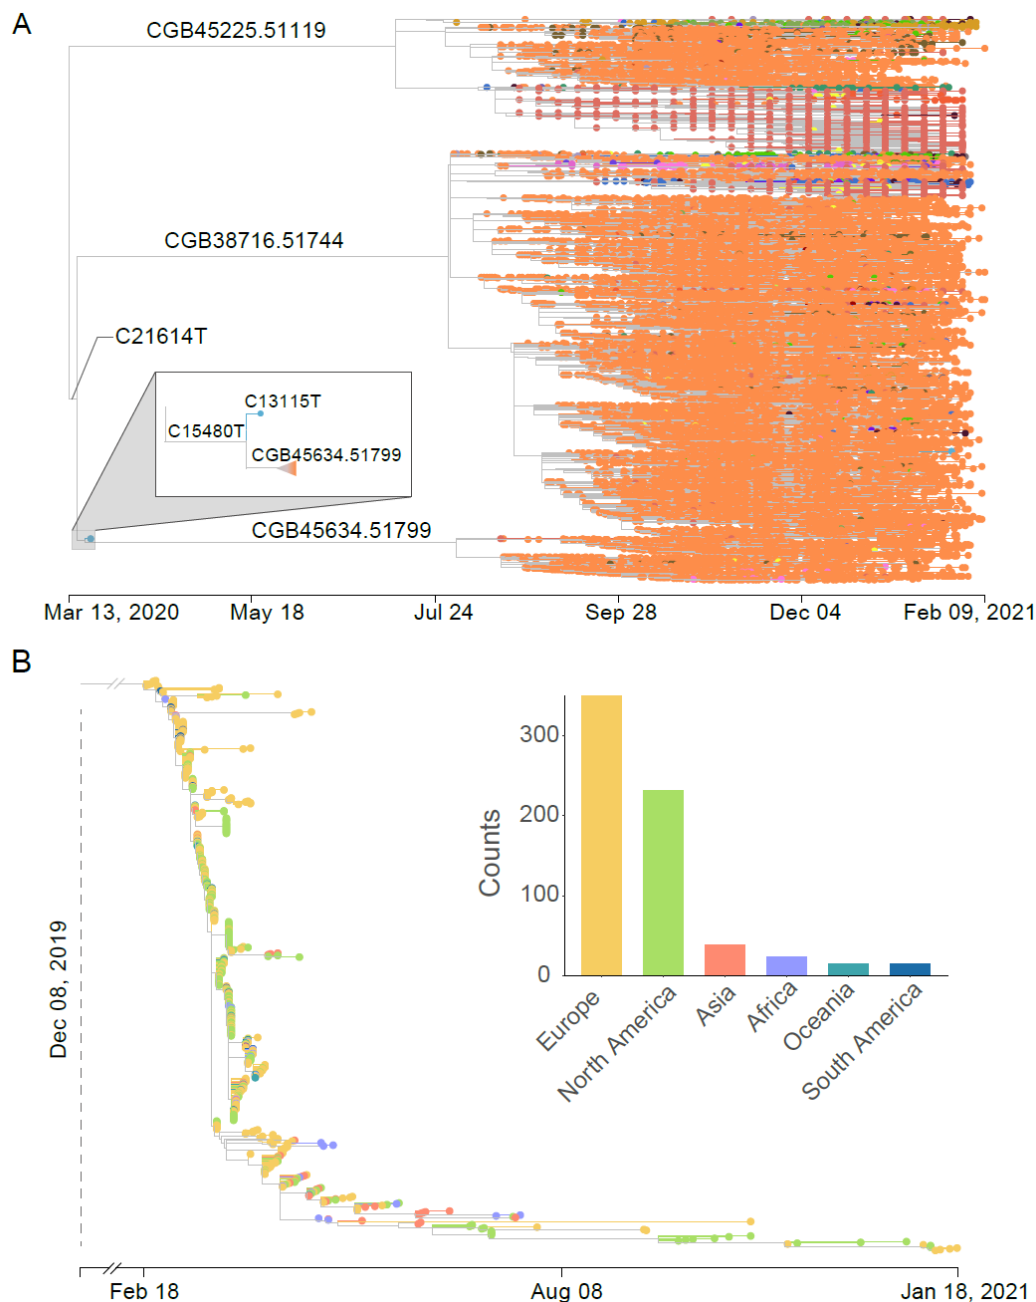

341

342 **Figure 4. Transmission of mutation-dormant SARS-CoV-2 variants.**

343 A) Tree visualization of strains of three related lineages with reduced evolutionary rate  
 344 among 330,942 SARS-CoV-2 genomic sequences. There were no mutations in the  
 345 strains of three long branches (CGB45225.51119, CGB38716.51744, and  
 346 CGB45634.51799) in 118, 112, and 135 days, respectively. The numbers of their  
 347 descendants were 9,815, 28,126, and 3,015, respectively. The three strains had  
 348 spread to more than 10 European countries, and most descendants were found in  
 349 Denmark (red tip) and UK (orange tip). Variants of these three lineages shared 13  
 350 mutations (G204T, C241T, T445C, C3037T, C6286T, C14408T, G21255C,

351 C22227T, A23403G, C26801G, C27944T, C28932T, and G29645T) but had two  
352 unique mutations (C21614T and C15480T).  
353 B) Tree visualization of 671 strains with no mutations between 8 December, 2019 and  
354 18 January, 2021. These strains are the descendants of a variant with four  
355 mutations (C3037T, A23403G, C14408T, and C241T) emerged before 8  
356 December, 2019. Among the four mutations, A23403G (S:D614G) and C14408T  
357 (ORF1b:P314L) are non-synonymous. The geographic distribution of the  
358 descendants is shown in the subpanel. Their siblings with additional mutations  
359 (16,442 strains) are not shown in the evolutionary tree. The CGB ID of their  
360 MRCA is CGB121.124.
