1  
2  
3  
4  
5  
6  
7  
8  
9

Coronavirus GenBrowser for monitoring  
the transmission and evolution of SARS-CoV-2

Dalang Yu<sup>1,7,†</sup>, Xiao Yang<sup>1,5,†</sup>, Bixia Tang<sup>2,†</sup>, Yi-Hsuan Pan<sup>3,†</sup>, Jianing Yang<sup>1,7,†</sup>, Junwei Zhu<sup>2,†</sup>, Guangya Duan<sup>2,7</sup>, Zi-Qian Hao<sup>1,7</sup>, Hailong Mu<sup>1</sup>, Long Dai<sup>1,5</sup>, Wangjie Hu<sup>1,7</sup>, Mochen Zhang<sup>2,7</sup>, Ying Cui<sup>2,7</sup>, Tong Jin<sup>2,7</sup>, Cuiping Li<sup>2</sup>, Lina Ma<sup>2</sup>, Language translation team<sup>6</sup>, Xiao Su<sup>4</sup>, Guo-Qing Zhang<sup>1,7,\*</sup>, Wenming Zhao<sup>2,7,\*</sup>, Haipeng Li<sup>1,7,8,\*</sup>

10  
11  
12  
13

<sup>1,†</sup>National Genomics Data Center, Bio-Med Big Data Center, CAS Key Laboratory of Computational Biology, Shanghai Institute of Nutrition and Health, Chinese Academy of Sciences, Shanghai 200031, China.

14  
15  
16

<sup>2,‡</sup>National Genomics Data Center, Beijing Institute of Genomics (China National Center for Bioinformation), Chinese Academy of Sciences, Beijing 100101, China.

17  
18  
19

<sup>3</sup>Key Laboratory of Brain Functional Genomics of Ministry of Education, School of Life Science, East China Normal University, Shanghai 200062, China.

20  
21

<sup>4</sup>Institut Pasteur of Shanghai, Chinese Academy of Sciences, Shanghai 200031, China.

22  
23

<sup>5</sup>Shanghai Shenyou Biotechnology Co. LTD, Shanghai 201315, China.

24  
25

<sup>6</sup>Beijing Language and Culture University, Beijing 100083, China.

26  
27  
28

<sup>7</sup>University of Chinese Academy of Sciences, Chinese Academy of Sciences, Beijing 100101, China.

29  
30  
31

<sup>8</sup>Center for Excellence in Animal Evolution and Genetics, Chinese Academy of Sciences, Kunming 650223, China.

32  
33

<sup>†</sup>These authors contributed equally.

34  
35

<sup>‡</sup>These institutes contributed equally.

36  
37  
38

\* **Corresponding authors:** gqzhang@picb.ac.cn; zhaowm@big.ac.cn; lihaipeng@picb.ac.cn

39  
40

**Short title:** Coronavirus GenBrowser

## Abstract

41  
42  
43  
44  
45  
46  
47  
48  
49  
50  
51  
52  
53  
54  
55  
56  
57  
58  
59  
60  
61  
62  
63  
64

COVID-19 has widely spread across the world, and much research is being conducted on the causative virus SARS-CoV-2. To help control the infection, we developed the Coronavirus GenBrowser (CGB) to monitor the pandemic. With CGB, 178,765 high quality SARS-CoV-2 genomic sequences were analyzed, and 121,522 mutations were identified. In total, 1,041 mutation cold spots were found, suggesting that these spots are key functional elements of SARS-CoV-2 and can be used for detection and vaccine development. CGB revealed 203 accelerated evolutions of SARS-CoV-2, but variants with accelerated evolution were not found to be highly contagious, suggesting that most of these evolutions are neutral. The B.1.1.7 (CGB75056.84017) lineage previously identified in the UK was not found to be significantly accelerated although its adaptive evolution was detected. Moreover, 2,297 strains with a significantly reduced evolutionary rate were identified, including three closely related variants widely spreading in Europe with no mutations in three months. By lineage tracing, a strain dated early March 2020 was determined to be the most recent common ancestor of nine strains collected from six different regions in three continents. This strain was also found to cause the outbreak in Xinfadi, Beijing, China in June 2020. CGB allows visualization and analysis of hundreds of thousands of SARS-CoV-2 genomic sequences. Distributed genome alignments and its effective analysis pipeline ensure timely update of the latest genomic data of SARS-CoV-2. CGB is an efficient platform for the general public to monitor the transmission and evolution of SARS-CoV-2.

## 65 Main Text

66

67 Severe acute respiratory syndrome coronavirus 2 (SARS-CoV-2)<sup>1-3</sup> has infected more  
68 than 102 million people, and more than 2 million people have died from COVID-19.  
69 Many factors have contributed to the COVID-19 pandemic<sup>4-6</sup>, and it has been predicted  
70 that the COVID-19 pandemic may last until 2025<sup>7,8</sup>. The pathogen genomics platform  
71 Nextstrain has allowed analysis of genomic sequences of approximately 4,000 strains  
72 of SARS-CoV-2 and investigation of its evolution<sup>9</sup>. As more than 317,000  
73 SARS-CoV-2 strains have been sequenced (Figure S1)<sup>10-12</sup>, analysis of all strains has  
74 far exceeded the capacity of Nextstrain. New approaches are needed to accomplish this  
75 task.

76

77 To allow timely analysis of a large number of viral genomes, we first solved the  
78 problem that all viral genomes have to be re-aligned when nucleotide sequences of new  
79 genomes become available. This is extremely time consuming. With the distributed  
80 alignment system (Figure 1), we dramatically reduced the total time required for the  
81 alignment. We also built the evolutionary tree on the existing tree with new genomic  
82 data in order to reduce the complexity of tree construction. With these modifications,  
83 hundreds of thousands of SARS-CoV-2 genomes can be timely analyzed with data  
84 easily shared and visualized on personal computers and smart phones (Figure 1).

85

86 For genomic sequence alignments, high quality SARS-CoV-2 genomic sequences were  
87 obtained from the 2019nCoV database<sup>10</sup>, which is an integrated resource based on  
88 CNGBdb, GenBank, GISAID<sup>11,12</sup>, GWH<sup>13</sup>, and NMDC. The sequences were aligned  
89<sup>14</sup> to that of the reference genome and presented as distributed alignments. Genomic  
90 sequences of bat coronavirus RaTG13<sup>15</sup>, pangolin coronavirus PCoV-GX-P1E<sup>16</sup>, and  
91 early SARS-CoV-2 strains collected before Jan 31, 2020 were jointly used to identify  
92 ancestral alleles of SARS-CoV-2. Mutations in strains of each branch of the  
93 evolutionary tree were indicated according to the principle of parsimony<sup>17</sup>. A highly  
94 effective maximum-likelihood method (TreeTime)<sup>18</sup> was used to determine the dates  
95 of internal nodes with very minor revisions.

96

97 In total, 178,765 high quality SARS-CoV-2 genomic sequences collected globally were  
98 analyzed, and 121,522 mutations were identified. With sliding window analysis, 1,041  
99 mutation cold spots were found with a false discovery rate (FDR) corrected *P*-value  
100 < 0.01 (Figure S5, Supplemental excel file). The top three cold spots were located in  
101 ORF1a encoding nsp3 phosphoesterase (nucleotides 7,394 – 7,419), ORF1b  
102 (nucleotides 15,451 – 15,539), and the receptor binding domain of the spike protein  
103 (nucleotides 23,128 – 23,184)<sup>3</sup> (FDR corrected *P*-value  $\leq 1.84 \times 10^{-12}$ ). These  
104 mutation cold spots may be key functional elements of SARS-CoV-2 and can  
105 potentially be used for vaccine development and targets for detection.

106

107 The genome-wide mutation rate of coronaviruses has been determined to be  $10^{-4}$  –  
108  $10^{-2}$  per nucleotide per year<sup>19</sup>. As this range of mutation rate is too wide, we decided

109 to estimate more precisely the genome-wide mutation rate ( $\mu$ ) of SARS-CoV-2 in a  
110 timely manner and determined that  $\mu = 6.8017 \times 10^{-4}$  per nucleotide per year (95%  
111 confidence interval:  $5.4262$  to  $8.2721 \times 10^{-4}$ ). The estimated  $\mu$  was lower than that  
112 of other coronaviruses, such as SARS-CoV ( $0.80$  to  $2.38 \times 10^{-3}$  per nucleotide per  
113 year)<sup>19</sup> and MERS-CoV ( $1.12 \times 10^{-3}$  per nucleotide per year)<sup>20</sup>. It was slightly lower  
114 than that determined by other investigators ( $9.90 \times 10^{-4}$  per nucleotide per year)<sup>21</sup>.  
115 Various mutation rates were found in different regions of the SARS-CoV-2 genome.  
116 The mutation rate of each gene is presented in Table S1.

117  
118 Similar to Nextstrain<sup>9</sup>, the pre-analyzed genomic data of SARS-CoV-2 variants on  
119 CGB are shared with the general public. The size of distributed alignments is 5,130 Mb  
120 for the high-quality 178,765 SARS-CoV-2 genomic sequences. The tree-based data  
121 format allows the compression ratio to reach 2,527:1, meaning that the size of  
122 compressed data file is as small as 2.03 Mb. This approach ensures low-latency access  
123 to the data and enables fast sharing and re-analysis of a large number of SARS-CoV-2  
124 genomic variants.

125  
126 To visualize, search, and filter the results of genomic analysis, both desktop standalone  
127 and web-based user-interface of CGB were developed. Similar to the UCSC  
128 SARS-CoV-2 Genome Browser<sup>22</sup> and the WashU Virus Genome Browser<sup>23</sup>, six  
129 genomic-coordinate annotated tracks were developed to show genome structure and  
130 key domains, allele frequencies, sequence similarity, multi-coronavirus genome  
131 alignment, and primer sets for detection of various SARS-CoV-2 strains (Figure S10).  
132 To efficiently visualize the results of genomic analysis, movie-making ability was  
133 implemented for painting the evolutionary tree, and only elements shown on the screen  
134 and visible to the user would be painted. This design makes the visualization process  
135 highly efficient, and the tree of more than 250,000 viral strains can be visualized even  
136 on a smart phone.

137  
138 CGB detects on-going positive selection based on S-shaped frequency trajectory of a  
139 selected allele (Figures S16, S17). It has been shown that the SARS-CoV-2 variant  
140 with G614 spike protein has a fitness advantage<sup>24,25</sup>. Our analysis using CGB  
141 confirmed this finding even when the G614 frequency was very low ( $< 10\%$ ) (Figure  
142 2). Thus, CGB is an efficient monitoring platform for detecting putative advantageous  
143 variants before they become widely spread. As an increase in mutation frequency  
144 could be due to sampling bias and epidemiological factors<sup>24</sup>, putative advantageous  
145 variants should be closely monitored.

146  
147 Using CGB, we analyzed branch-specific accelerated evolution of SARS-CoV-2 and  
148 found that 203 internal branches of the evolutionary tree (FDR corrected  $P < 0.05$ ,  
149 Poisson probability, Supplemental excel file) had significantly more mutations. All  
150 evolution-accelerated variants were not found to spread significantly faster than other  
151 variants during the same period of time, suggesting that these variants are not highly

152 contagious and that most of the accelerated evolutions are neutral. The majority  
153 (157/203 = 77.3%) of these variants even had relatively fewer descendants.

154  
155 The B.1.1.7 (CGB75056.84017) lineage was recently identified in the UK <sup>26</sup>. Although  
156 it has 23 mutations, its evolutionary rate was not significantly accelerated (FDR  
157 corrected  $P = 0.346$ , Poisson probability) as the branch of this lineage spans 7.5  
158 months. Its mutation rate was determined to be  $5.5382 \times 10^{-4}$  per nucleotide per  
159 year (see Supplemental materials), slightly lower than that estimated from the entire  
160 set of strains. However, the spread of B.1.1.7 variants was significantly faster than  
161 other variants collected in mid-September 2020 (FDR corrected  $P = 0.0032$ ). The  
162 frequencies of S:S982A and S:D1118H mutations, first found on the B.1.1.7 branch,  
163 appeared to be in the early stage of an S-shaped rising (Figure 2).

164  
165 CGB is also an efficient platform to investigate local and global transmission of  
166 COVID-19 (Figure 3). There was an outbreak in Qingdao, China <sup>27</sup> after two dock  
167 workers were found to have asymptomatic infections on September 24, 2020. CGB  
168 lineage tracing revealed that the sequence of a sample collected from the outer  
169 packaging of cold-chain products is identical to that of the most recent common  
170 ancestor of the two strains isolated from the two dock workers (Figure 3B), suggesting  
171 that infection of these two individuals was cold-chain related. However, this possibility  
172 remains to be determined.

173  
174 CGB lineage tracing also revealed the difficulty in controlling COVID-19 pandemic.  
175 There was an outbreak in Xinfadi, Beijing, China <sup>28,29</sup>. The sequences of two isolates  
176 (Beijing/IVDC-02-06 and Beijing/BJ0617-01-Y), collected from two Xinfadi cases on  
177 June 11 and 14, 2020, were found to be identical to the sequence of an ancestral strain  
178 (Figure 3C) dated March 6, 2020 (95% CI: February 28 – March 17, 2020). This  
179 ancestral strain was found to spread to Taiwan, India, Czech Republic, England,  
180 Denmark, and Colombia and caused the outbreak in Beijing three months later. These  
181 two Xinfadi strains were also found to evolve significantly slowly ( $P = 0.0043$  and  
182  $0.0051$ , respectively, Poisson probability) because no mutations were detected  
183 between March and June 2020.

184  
185 CGB is a powerful tool for identification of global and regional routes of virus  
186 transmission as it is specially designed to determine whether the mutation rate of a  
187 specific strain is lower than the average mutation rate of the entire set of strains. This  
188 lineage-specific reduced mutation rate could be due to a long period of dormancy  
189 caused by the yet to be confirmed cold-chain preservation <sup>29</sup> or other reasons. Among  
190 the 178,765 SARS-CoV-2 strains, 2,297 strains were found to evolve significantly  
191 slowly (FDR corrected  $P = 3.45 \times 10^{-4} \sim 0.05$ , Poisson probability, Supplemental  
192 excel file) and did not mutate in 133 days. In addition, three closely related variants  
193 were found to have no mutations in 3 months, and their descendants widely spread in  
194 Europe (Figure 4A).

195

196 All timely-updated data are freely available at <https://bigd.big.ac.cn/ncov/apis/>. The  
197 desktop standalone version provides the full function of CGB and has a plug-in module  
198 for the eGPS software (<http://www.egps-software.net/>)<sup>30</sup>. Although the web-based  
199 CGB is a simplified version (<https://www.biosino.org/genbrowser/> and  
200 <https://bigd.big.ac.cn/genbrowser/>) and designed mainly for educational purpose, it  
201 provides a convenient way to access the data via a web browser, such as Google  
202 Chrome, Firefox, and Safari (Figure 4B, C). The web-based CGB package can be  
203 downloaded and reinstalled on any websites. Nine language versions (Chinese, English,  
204 German, Japanese, French, Italian, Portuguese, Russian, and Spanish) are available.

205

## 206 **Acknowledgments**

207

208 We thank Ya-Ping Zhang for providing valuable advices and encouragement and the  
209 researchers who generated and deposited sequence data of SARS-CoV-2 in GISAID,  
210 GenBank, CNGBdb, GWH, and NMDC, making this study possible. This work was  
211 supported by a grant from the National Key Research and Development Project (No.  
212 2020YFC0847000).

213

## 214 **Members of the language translation team**

215 German: Ning He<sup>6</sup>, Jing Lv<sup>6</sup>, Ting Peng<sup>6</sup>

216 Italian: Ting Zhou<sup>6</sup>, Nan Yang<sup>6</sup>, Siyi Hou<sup>6</sup>

217 Portuguese: Huang Li<sup>6</sup>, Jingxuan Yan<sup>6</sup>, Chenglin Zhu<sup>6</sup>, Wenjing Liu<sup>6</sup>

218 Russian: Yuhong Guan<sup>6</sup>, Huanxiao Song<sup>6</sup>

219 Spanish: Qin Zhou<sup>6</sup>, Han Gao<sup>6</sup>, Jinglan He<sup>6</sup>, Tiantian Li<sup>6</sup>, Ruiwen Fei<sup>6</sup>, Shumei Zhang<sup>6</sup>

220 French: Yuyuan Guo<sup>6</sup>

221

## 222 **Author contributions**

223 YHP, GQZ, WZ, and HL designed the study; DY, XY, BT, YHP, JY, JZ, GD, ZQH,  
224 HM, LD, GQZ, WZ, and HL wrote the code and developed CGB; DY, XY, BT, YHP,  
225 JY, JZ, GD, ZQH, WH, XS, GQZ, WZ, and HL acquired, analyzed, and interpreted  
226 the data; LM, MZ, YC, GD, TJ and CL integrated and curated the source data;  
227 members of the language translation team translated CGB into multiple languages;  
228 DY, YHP, JY, JZ, GQZ, WZ, and HL wrote the manuscript. All authors have  
229 approved the submitted version.

230

## 231 **Competing interests**

232 The authors declare no competing interests.

233

## 234 **Additional information**

235 **Supplementary information** is available for this paper.

236 **Correspondence and requests for materials** should be addressed to G.Q.Z., W.Z.,  
237 or H.L.

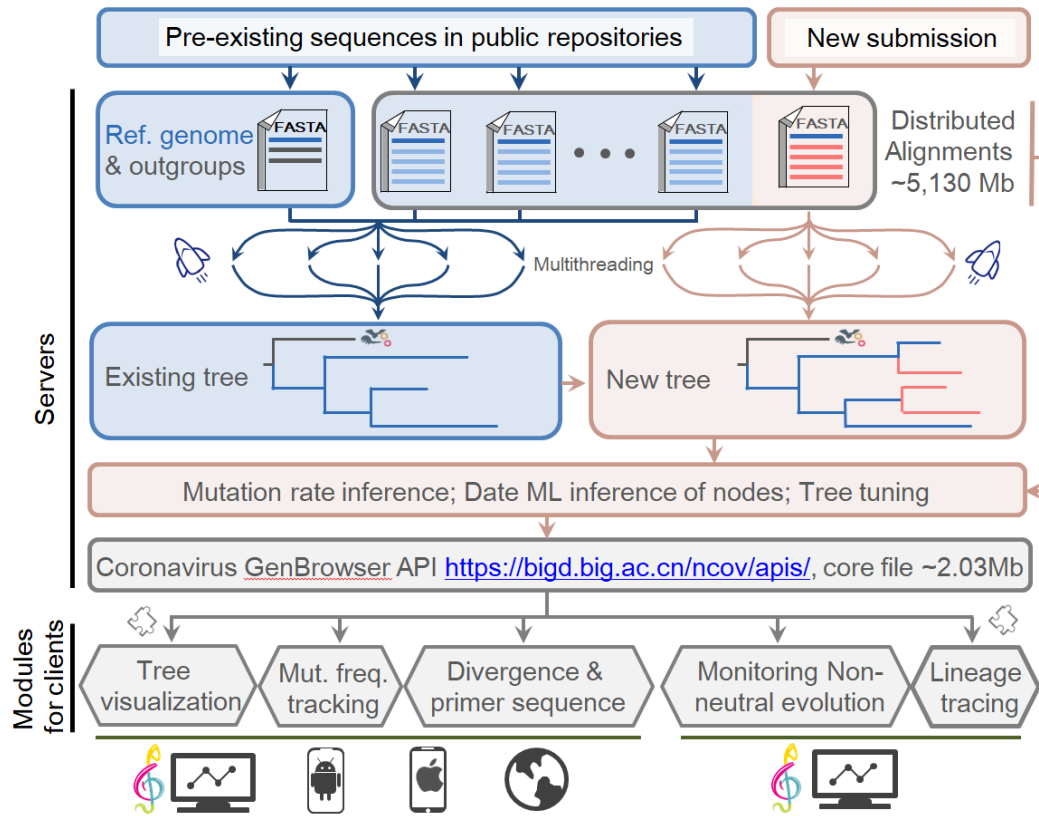

238  
239  
240  
241  
242  
243  
244

**Figure 1. Timely updates and visualization framework of Coronavirus GenBrowser.** The pre-analyzed genomic data of SARS-CoV-2 variants can be freely accessed via <https://bigd.big.ac.cn/ncov/apis/>.

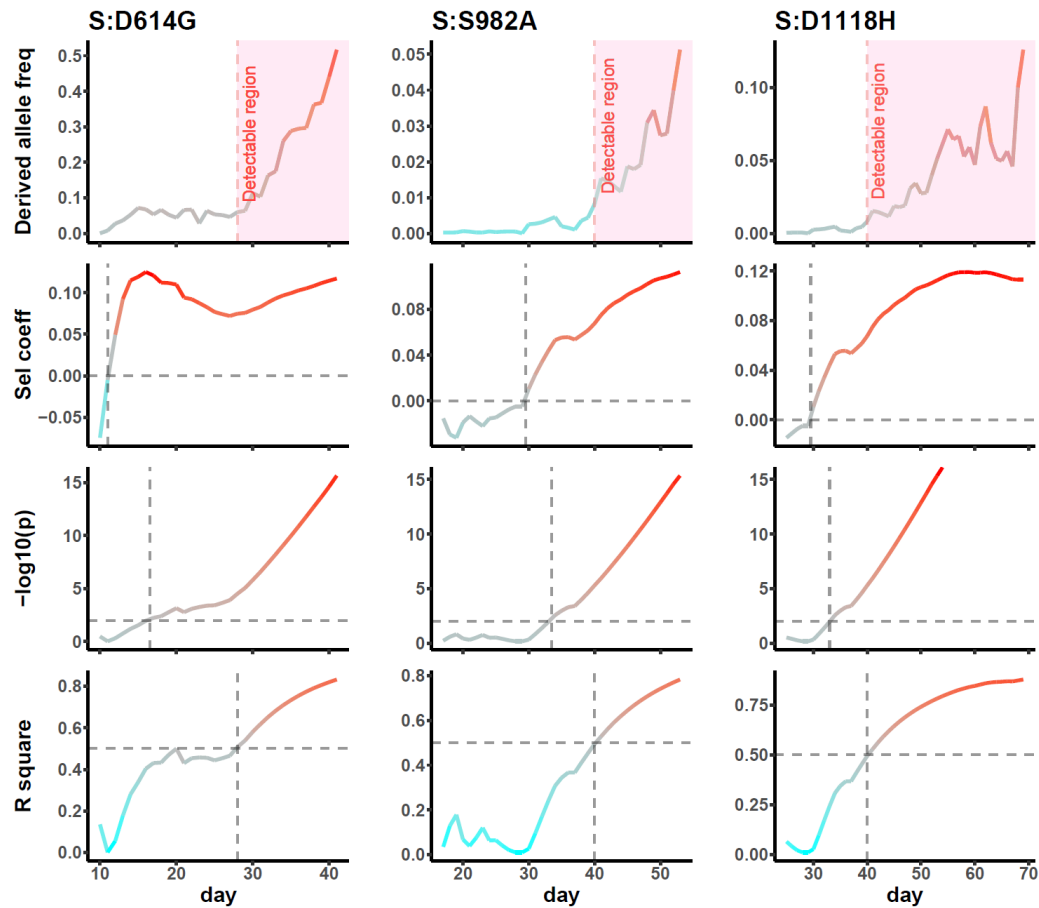

245  
246  
247  
248  
249  
250  
251  
252

**Figure 2. Putative advantageous variants of SARS-CoV-2.** The  $x$ -axis displays number of days since the first appearance of derived allele in the global viral population. Predicted adaptation is marked in pink. Dashed gray crossings denote meaningful top right corners with a positive selection coefficient,  $p < 0.01$ , and  $R^2 > 50\%$ .



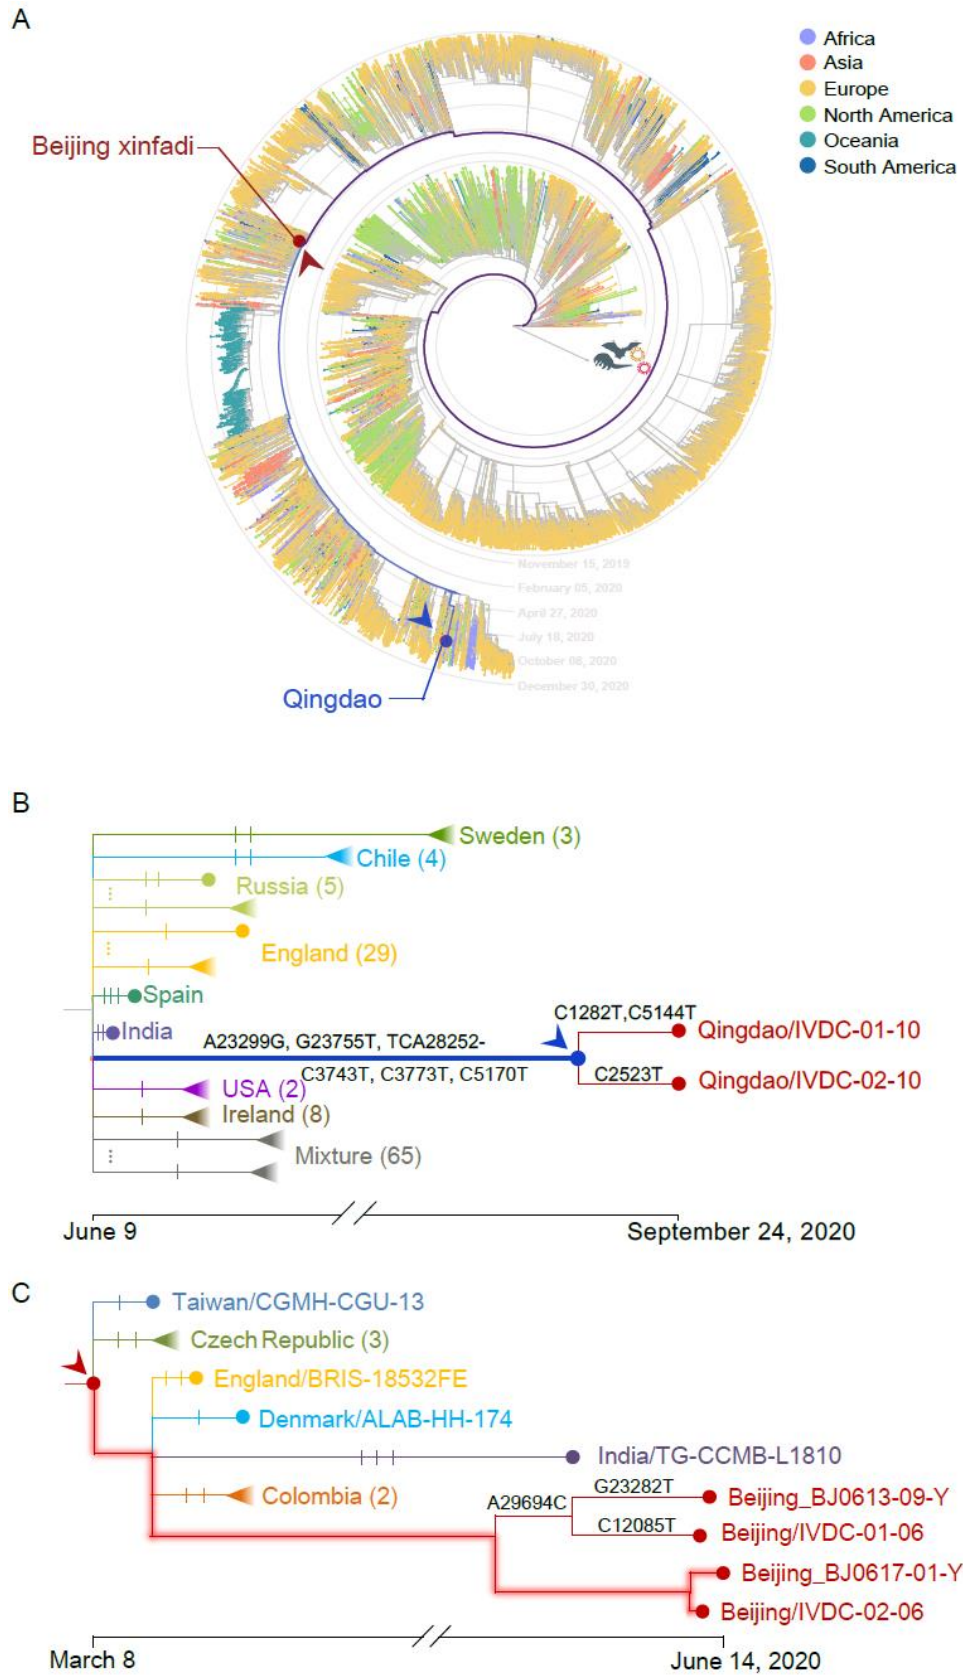

253

254

255 **Figure 3. Global and zoom-in views of lineages associated with Qingdao and**

256 **Beijing outbreaks.**

- 257 A) The lineages of traced targets are shown in blue and dark red lines. The tree of  
258 178,765 viral strains was used.
- 259 B) Qingdao/IVDC-01-10 and Qingdao/IVDC-02-10 were the two SARS-CoV-2  
260 strains collected on September 24, 2020 from two dock workers in Qingdao,  
261 China. The query strain (env/Qingdao/IVDC-011-10) was found on an outer  
262 packaging of cold-chain products on October 7, 2020. The environmental strain,  
263 marked with a blue solid circle with an arrowhead, was found to be identical to the  
264 most recent common ancestor of the two strains from the two dock workers. Each  
265 notch of the branches represents a mutation. Mutations of the Qingdao strains are  
266 indicated.
- 267 C) The ancestral viral strain found in early March 2020 is marked with a dark-red  
268 solid circle and an arrowhead. This strain is identical to the two strains  
269 (Beijing/IVDC-02-06 and Beijing/BJ0617-01-Y) collected from two Xinfadi cases  
270 on June 11 and 14, 2020. The branches with no mutations are highlighted.

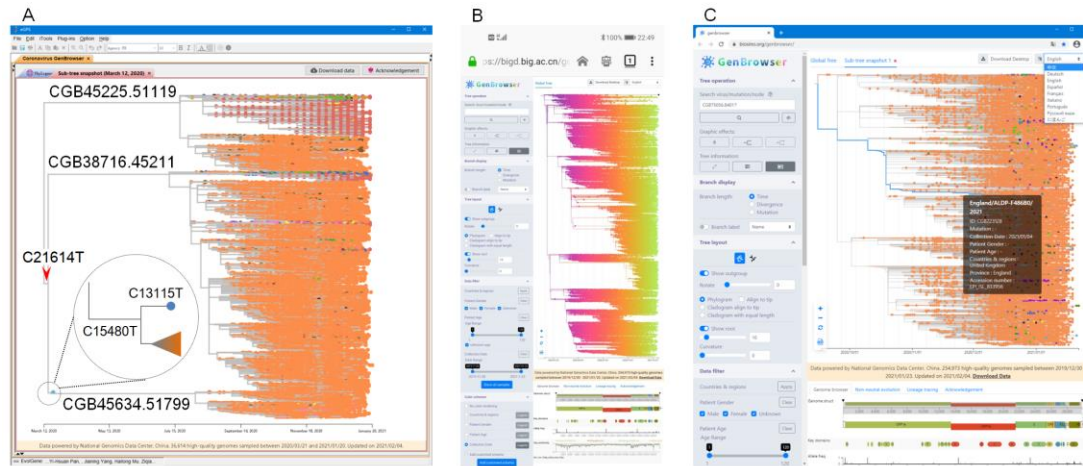

271  
272  
273  
274  
275  
276  
277  
278  
279  
280  
281  
282  
283  
284  
285  
286  
287  
288  
289  
290  
291  
292  
293

**Figure 4. Tree visualization with CGB.**

- A) Tree visualization of three closely related lineages with the reduced evolutionary rate among 254,973 SARS-CoV-2 genomic sequences with desktop standalone CGB. There were no mutations in strains of three long branches (CGB45225.51119, CGB38716.45211, and CGB45634.51799) with inferred duration of 130, 116, and 138 days, respectively. The numbers of their descendants were 8,738, 25,050, and 2,825, respectively. The three strains spread to 14 European countries (Austria, Belgium, Denmark, Finland, France, Germany, Iceland, Ireland, Lithuania, Luxembourg, Netherlands, Norway, Switzerland, and United Kingdom), and most descendants were from Denmark (in red tip) and UK (in orange tip). These three lineages shared 13 mutations (G204T, C241T, T445C, C3037T, C6286T, C14408T, G21255C, C22227T, A23403G, C26801G, C27944T, C28932T, and G29645T) but had two unique mutations (C21614T and C15480T). The control panel and annotated tracks are hidden.
- B) Web-based CGB tree visualization of 254,973 genomes with the Android version of Firefox.
- C) Web-based CGB tree visualization of the B.1.1.7 (CGB75056.84017) UK lineage among 254,973 SARS-CoV-2 genomic sequences with the desktop version of Google Chrome.

## 294 References

295

- 296 1 Zhu, N. *et al.* A novel coronavirus from patients with pneumonia in China, 2019. *N Engl J*  
297 *Med* **382**, 727-733 (2020).
- 298 2 Lu, R. *et al.* Genomic characterisation and epidemiology of 2019 novel coronavirus:  
299 implications for virus origins and receptor binding. *Lancet* **395**, 565-574 (2020).
- 300 3 Wu, F. *et al.* A new coronavirus associated with human respiratory disease in China. *Nature*  
301 **579**, 265-269 (2020).
- 302 4 Boni, M. F. *et al.* Evolutionary origins of the SARS-CoV-2 sarbecovirus lineage responsible  
303 for the COVID-19 pandemic. *Nat Microbiol* **5**, 1408-1417 (2020).
- 304 5 Lan, J. *et al.* Structure of the SARS-CoV-2 spike receptor-binding domain bound to the ACE2  
305 receptor. *Nature* **581**, 215-220 (2020).
- 306 6 Hao, X. *et al.* Reconstruction of the full transmission dynamics of COVID-19 in Wuhan.  
307 *Nature* **584**, 420-424 (2020).
- 308 7 Kissler, S. M., Tedijanto, C., Goldstein, E., Grad, Y. H. & Lipsitch, M. Projecting the  
309 transmission dynamics of SARS-CoV-2 through the postpandemic period. *Science* **368**,  
310 860-868 (2020).
- 311 8 Scudellari, M. The pandemic's future. *Nature* **584**, 22-25 (2020).
- 312 9 Hadfield, J. *et al.* Nextstrain: real-time tracking of pathogen evolution. *Bioinformatics* **34**,  
313 4121-4123 (2018).
- 314 10 Zhao, W.-M. *et al.* The 2019 novel coronavirus resource. *Yi Chuan* **42**, 212-221 (2020).
- 315 11 Shu, Y. L. & McCauley, J. GISAID: Global initiative on sharing all influenza data - from  
316 vision to reality. *Eurosurveillance* **22**, 2-4 (2017).
- 317 12 Elbe, S. & Buckland-Merrett, G. Data, disease and diplomacy: GISAID's innovative  
318 contribution to global health. *Glob Chall* **1**, 33-46 (2017).
- 319 13 Zhang, Z. *et al.* Database resources of the National Genomics Data Center in 2020. *Nucleic*  
320 *Acids Res* **48**, D24-D33 (2020).
- 321 14 Katoh, K. & Standley, D. M. MAFFT multiple sequence alignment software version 7:  
322 Improvements in performance and usability. *Mol Biol Evol* **30**, 772-780 (2013).
- 323 15 Zhou, P. *et al.* A pneumonia outbreak associated with a new coronavirus of probable bat origin.  
324 *Nature* **579**, 270-273 (2020).
- 325 16 Lam, T. T.-Y. *et al.* Identifying SARS-CoV-2-related coronaviruses in Malayan pangolins.  
326 *Nature* **583**, 282-285 (2020).
- 327 17 Hartigan, J. A. Minimum mutation fits to a given tree. *Biometrics* **29**, 53-65 (1973).
- 328 18 Sagulenko, P., Puller, V. & Neher, R. A. TreeTime: Maximum-likelihood phylodynamic  
329 analysis. *Virus Evol* **4**, vex042 (2018).
- 330 19 Zhao, Z. M. *et al.* Moderate mutation rate in the SARS coronavirus genome and its  
331 implications. *BMC Evol Biol* **4**, 21 (2004).
- 332 20 Cotten, M. *et al.* Spread, circulation, and evolution of the Middle East respiratory syndrome  
333 coronavirus. *Mbio* **5**, e01062-01013 (2014).
- 334 21 Nie, Q. *et al.* Phylogenetic and phylodynamic analyses of SARS-CoV-2. *Virus Res* **287**,  
335 198098 (2020).
- 336 22 Fernandes, J. D. *et al.* The UCSC SARS-CoV-2 Genome Browser. *Nat Genet* **52**, 986-991  
337 (2020).

- 338 23 Flynn, J. A. *et al.* Exploring the coronavirus pandemic with the WashU Virus Genome  
339 Browser. *Nat Genet* **52**, 986-1001 (2020).
- 340 24 Korber, B. *et al.* Tracking changes in SARS-CoV-2 Spike: Evidence that D614G increases  
341 infectivity of the COVID-19 virus. *Cell* **182**, 812-827 (2020).
- 342 25 Plante, J. A. *et al.* Spike mutation D614G alters SARS-CoV-2 fitness. *Nature*,  
343 doi:10.1038/s41586-020-2895-3 (2020).
- 344 26 Rambaut, A. *et al.* Preliminary genomic characterisation of an emergent SARS-CoV-2 lineage  
345 in the UK defined by a novel set of spike mutations. *virological.org*,  
346 [https://virological.org/t/preliminary-genomic-characterisation-of-an-emergent-sars-cov-2-linea](https://virological.org/t/preliminary-genomic-characterisation-of-an-emergent-sars-cov-2-lineage-in-the-uk-defined-by-a-novel-set-of-spike-mutations/563)  
347 [ge-in-the-uk-defined-by-a-novel-set-of-spike-mutations/563](https://virological.org/t/preliminary-genomic-characterisation-of-an-emergent-sars-cov-2-lineage-in-the-uk-defined-by-a-novel-set-of-spike-mutations/563) (2020).
- 348 27 Xing, Y., Wong, G. W. K., Ni, W., Hu, X. & Xing, Q. Rapid response to an outbreak in  
349 Qingdao, China. *N Engl J Med* **383**, e129 (2020).
- 350 28 Zhang, Y. *et al.* Genomic characterization of SARS-CoV-2 identified in a reemerging  
351 COVID-19 outbreak in Beijing's Xinfadi market in 2020. *Biosaf Health* **2**, 202-205 (2020).
- 352 29 Pang, X. *et al.* Cold-chain food contamination as the possible origin of Covid-19 resurgence in  
353 Beijing. *Natl Sci Rev* **7**, 1861-1864 (2020).
- 354 30 Yu, D. *et al.* eGPS 1.0: comprehensive software for multi-omic and evolutionary analyses.  
355 *Natl Sci Rev* **6**, 867-869 (2019).
- 356
