# 1            **Coronavirus GenBrowser for monitoring the transmission and** 2            **evolution of SARS-CoV-2**

3  
4 Dalang Yu<sup>1,7,†</sup>, Xiao Yang<sup>1,5,†</sup>, Bixia Tang<sup>2,†</sup>, Yi-Hsuan Pan<sup>3,†</sup>, Jianing Yang<sup>1,7,†</sup>, Junwei  
5 Zhu<sup>2,†</sup>, Guangya Duan<sup>2,7</sup>, Zi-Qian Hao<sup>1,7</sup>, Hailong Mu<sup>1</sup>, Long Dai<sup>1,5</sup>, Wangjie Hu<sup>1,7</sup>,  
6 Mochen Zhang<sup>2,7</sup>, Ying Cui<sup>2,7</sup>, Tong Jin<sup>2,7</sup>, Cuiping Li<sup>2</sup>, Lina Ma<sup>2</sup>, Language  
7 translation team<sup>6</sup>, Xiao Su<sup>4</sup>, Guo-Qing Zhang<sup>1,7,\*</sup>, Wenming Zhao<sup>2,7,\*</sup>, Haipeng Li<sup>1,7,8,\*</sup>

8  
9 <sup>1,‡</sup>National Genomics Data Center, Bio-Med Big Data Center, CAS Key Laboratory of  
10 Computational Biology, Shanghai Institute of Nutrition and Health, Chinese  
11 Academy of Sciences, Shanghai 200031, China.

12 <sup>2,‡</sup>National Genomics Data Center, Beijing Institute of Genomics (China National  
13 Center for Bioinformatics), Chinese Academy of Sciences, Beijing 100101,  
14 China.

15 <sup>3</sup>Key Laboratory of Brain Functional Genomics of Ministry of Education, School of  
16 Life Science, East China Normal University, Shanghai 200062, China.

17 <sup>4</sup>Institut Pasteur of Shanghai, Chinese Academy of Sciences, Shanghai 200031,  
18 China.

19 <sup>5</sup>Shanghai Shenyou Biotechnology Co. LTD, Shanghai 201315, China.

20 <sup>6</sup>Beijing Language and Culture University, Beijing 100083, China.

21 <sup>7</sup>University of Chinese Academy of Sciences, Chinese Academy of Sciences, Beijing  
22 100101, China.

23 <sup>8</sup>Center for Excellence in Animal Evolution and Genetics, Chinese Academy of  
24 Sciences, Kunming 650223, China.

25  
26 <sup>†</sup>These authors contributed equally.

27 <sup>‡</sup>These institutes contributed equally.

28  
29 **\*Corresponding authors. Email:** gqzhang@picb.ac.cn; zhaowm@big.ac.cn;  
30 lihaipeng@picb.ac.cn

31  
32 **Short title:** Coronavirus GenBrowser

33

34 **Abstract:** A large volume of SARS-CoV-2 genomic data has accumulated. To timely  
35 analyze and visualize the exponentially increasing viral genomic sequences, we  
36 developed the Coronavirus GenBrowser (CGB) based on the framework of distributed  
37 genome alignments and the evolutionary tree built on an existing subtree. Among the  
38 330,942 high-quality SARS-CoV-2 genomic sequences analyzed, 253,798 mutations  
39 were identified, and three prevalent European variants were found to have no  
40 mutations in three months. This analysis also revealed a strain dated early March 2020  
41 causing an outbreak in Beijing after three months of dormancy. Another strain with  
42 S:D614G was found to have 671 identical descendants spreading in six continents  
43 between February 2020 and January 2021. Results of this study show that CGB is an  
44 efficient platform for monitoring the dynamics of SARS-CoV-2 transmission.

45

46

47 **One Sentence Summary:** CGB enables large-scale analysis of the latest  
48 SARS-CoV-2 genomic sequences to timely reveal the dynamics of COVID-19  
49 pandemic.

50

51

52 **Main Text:** Severe acute respiratory syndrome coronavirus 2 (SARS-CoV-2)<sup>1-3</sup> has  
53 infected more than 116 million people, and more than 2.5 million people have died  
54 from COVID-19. Several web browsers have been developed to track the COVID-19  
55 pandemic. The browser of the Johns Hopkins Coronavirus Resource Center displays  
56 global and regional COVID-19 status, including numbers of confirmed cases, deaths,  
57 tests, hospitalizations, and vaccinations (<https://coronavirus.jhu.edu/>). The COVID-3D  
58 browser, developed by the University of Melbourne, shows the three-dimensional  
59 structures of various wild-type and mutant proteins of SARS-CoV-2 based on their  
60 nucleotide sequences<sup>4</sup>. The UCSC SARS-CoV-2 Genome Browser is derived from the  
61 well-established UCSC genome-browser for visualization of nucleotide and protein  
62 sequences, sequence conservations, potential epitopes for production of antibodies,  
63 primers for RT-PCR and sequencing, and many other properties of specific parts of  
64 wild-type and variants of SARS-CoV-2<sup>5</sup>. The WashU Virus Genome Browser  
65 provides Nextstrain-based phylogenetic-tree view and genomic-coordinate,  
66 track-based view of genomic features of viruses<sup>6</sup>. It also has many functions similar to  
67 those of the UCSC SARS-CoV-2 Genome Browser such as visualization of sequence  
68 variations, genomic sites for diagnostic tests, and immunogenic epitopes. In addition, it  
69 continuously updates repository of SARS-CoV-2 genomic data.

70  
71 Nextstrain is a browser for real-time tracking of pathogen evolution. It hosts tools for  
72 phylodynamic analysis of genomic sequences of pathogens of both endemic and  
73 pandemic diseases. Nextstrain has allowed analysis of genomic sequences of  
74 approximately 4,000 strains of SARS-CoV-2 and investigation of its evolution<sup>7</sup>. As  
75 more than 705,000 SARS-CoV-2 genomic sequences have been deposited in public  
76 databases, such as National Center for Biotechnology Information (NCBI) GenBank<sup>8</sup>  
77 and Global Initiative on Sharing All Influenza Data (GISAID)<sup>9,10</sup>, analysis of these  
78 data has far exceeded the capacity of Nextstrain. New approaches are needed to  
79 accomplish this task. Therefore, we developed the Coronavirus GenBrowser (CGB).

80  
81 To allow timely analysis of a large number of SAR-CoV-2 genomic sequences, we first  
82 solved the problem that all viral genomic sequences have to be re-aligned when  
83 nucleotide sequences of new genomes become available. This is extremely time  
84 consuming. With the distributed alignment system (Figure 1), we dramatically reduced  
85 the total time required for the alignment. We also built the evolutionary tree on the  
86 existing tree with new genomic data in order to reduce the complexity of tree  
87 construction. With these modifications, hundreds of thousands of SARS-CoV-2  
88 genomes can be timely analyzed with data easily shared and visualized (Figure 1).

89

90 For genomic sequence alignments, high quality SARS-CoV-2 genomic sequences were  
91 obtained from the 2019nCoV database <sup>11,12</sup>, which is an integrated resource based on  
92 GenBank, GISAID <sup>9,10</sup>, China National GeneBank DataBase (CNCBdb) <sup>13</sup>, the  
93 Genome Warehouse (GWH) <sup>14</sup>, and the National Microbiology Data Center (NMDC,  
94 <https://nmdc.cn/>). The sequences were aligned <sup>15</sup> to that of the reference genome <sup>3</sup> and  
95 presented as distributed alignments. Genomic sequences of bat coronavirus RaTG13 <sup>16</sup>,  
96 pangolin coronavirus PCoV-GX-P1E <sup>17</sup>, and SARS-CoV-2 strains collected before  
97 January 31, 2020 were jointly used to identify ancestral alleles of SARS-CoV-2.  
98 Mutations in strains of each branch of the evolutionary tree were indicated according  
99 to the principle of parsimony <sup>18</sup>. A highly effective maximum-likelihood method  
100 (TreeTime) <sup>19</sup> was used to determine the dates of internal nodes with very minor  
101 revisions.

102

103 In total, 330,942 high quality SARS-CoV-2 genomic sequences were analyzed, and  
104 253,798 (recurrent) mutations were identified. With sliding window analysis, 971  
105 mutation cold spots were found with a false discovery rate (FDR) corrected *P*-value  
106  $< 0.01$  (Figure S5, Supplemental excel file). The coldest spot is located in ORF1a,  
107 which encodes nsp3 phosphoesterase (nucleotides 7,394 – 7,419) (FDR corrected  
108  $P$ -value =  $4.28 \times 10^{-29}$ ). These mutation cold spots may be key functional elements  
109 of SARS-CoV-2 and can potentially be used for vaccine development and targets for  
110 detection.

111

112 The genome-wide mutation rate of coronaviruses has been determined to be  $10^{-4}$  –  
113  $10^{-2}$  per nucleotide per year <sup>20</sup>. As this range of mutation rate is too wide, we decided  
114 to estimate more precisely the genome-wide mutation rate ( $\mu$ ) of SARS-CoV-2 and  
115 determined that  $\mu = 6.8017 \times 10^{-4}$  per nucleotide per year (95% confidence interval:  
116 5.4262 to  $8.2721 \times 10^{-4}$ ). The estimated  $\mu$  was lower than that of other  
117 coronaviruses, such as SARS-CoV ( $0.80$  to  $2.38 \times 10^{-3}$  per nucleotide per year) <sup>20</sup>  
118 and MERS-CoV ( $1.12 \times 10^{-3}$  per nucleotide per year) <sup>21</sup>. It was slightly lower than  
119 that determined by other investigators ( $9.90 \times 10^{-4}$  per nucleotide per year) <sup>22</sup>.

120 Various mutation rates were found in different regions of the SARS-CoV-2 genome.  
121 The mutation rate of each gene is shown in Table S1.

122

123 Similar to Nextstrain <sup>7</sup>, the pre-analyzed genomic data of SARS-CoV-2 variants and  
124 the associated metadata on CGB are shared with the general public. The size of  
125 distributed alignments is 9,498 Mb for the high-quality 330,942 SARS-CoV-2 genomic

126 sequences. The tree-based data format allows the compression ratio to reach 2,499:1,  
127 meaning that the size of compressed core file containing pre-analyzed genomic data  
128 and associated metadata is as small as 3.80 Mb (Figure 1). This approach ensures  
129 low-latency access to the data and enables fast sharing and re-analysis of a large  
130 number of SARS-CoV-2 genomic variants.

131

132 To visualize, search, and filter the results of genomic analysis, both desktop standalone  
133 and web-based user-interface of CGB were developed. Similar to the UCSC  
134 SARS-CoV-2 Genome Browser<sup>5</sup> and the WashU Virus Genome Browser<sup>6</sup>, six  
135 genomic-coordinate annotated tracks were developed to show genome structure and  
136 key domains, allele frequencies, sequence similarity, multi-coronavirus genome  
137 alignment, and primer sets for detection of various SARS-CoV-2 strains (Figure S11).  
138 To efficiently visualize the results of genomic analysis, movie-making ability was  
139 implemented for painting the evolutionary tree, and only elements shown on the screen  
140 and visible to the user would be painted. This design makes the visualization process  
141 highly efficient, and the evolutionary tree of more than one million strains can be  
142 visualized simultaneously.

143

144 CGB detects on-going positive selection based on S-shaped frequency trajectory of a  
145 selected allele (Figures S18, S19). It has been shown that the SARS-CoV-2 variant  
146 with G614 spike protein has a fitness advantage<sup>23</sup>. Our analysis using CGB confirmed  
147 this finding even when the G614 frequency was very low (< 10%) (Figure 2),  
148 indicating that CGB can detect putative advantageous variants before they become  
149 widely spread. GCB also predicted an increase in the frequency of S:HV69- deletion  
150 of the B.1.1.7 lineage<sup>24</sup> (Figure 2), suggesting that variants with the deletion may be  
151 advantageous. As an increase in mutation frequency could be due to sampling bias  
152 and epidemiological factors<sup>23</sup>, putative advantageous variants should be closely  
153 monitored.

154

155 Using CGB, we analyzed branch-specific accelerated evolution of SARS-CoV-2 and  
156 found that 246 internal branches of the evolutionary tree (FDR corrected  $P < 0.05$ ,  
157 Supplemental excel file) had significantly more mutations. All evolution-accelerated  
158 variants were not found to spread significantly faster than other variants during the  
159 same period of time as the majority ( $168/225 = 74.6\%$ ) of these variants had  
160 relatively fewer descendants. This observation suggests that these variants are not  
161 highly contagious. It is likely that these evolution-accelerated variants were evolved  
162 neutrally instead of adaptively.

163  
164 CGB is also an efficient platform to investigate local and global transmission of  
165 COVID-19 (Figure 3). There was an outbreak in Qingdao, China<sup>25</sup> after two dock  
166 workers were found to have asymptomatic infections on September 24, 2020. CGB  
167 lineage tracing revealed that the sequence of a sample collected from the outer  
168 packaging of cold-chain products is identical to that of the most recent common  
169 ancestor of the two strains isolated from the two dock workers (Figure 3B), suggesting  
170 that infection of these two individuals was cold-chain related.  
171  
172 CGB lineage tracing also revealed the difficulty in controlling COVID-19 pandemic.  
173 There was an outbreak in Xinfadi, Beijing, China<sup>26,27</sup>. The sequences of two isolates  
174 (Beijing/IVDC-02-06 and Beijing/BJ0617-01-Y), collected from two Xinfadi cases on  
175 June 11 and 14, 2020, were found to be identical to the sequence of the variant  
176 (CGB4268.5142) (Figure 3C) dated March 6, 2020 (95% CI: February 28 – March 17,  
177 2020). This variant was found to spread to Taiwan, India, Czech Republic, England,  
178 Denmark, and Colombia and caused the outbreak in Beijing three months later. It was  
179 also detected in the United States (NY-Wadsworth-21013812-01/2020) on December  
180 18, 2020. These two Xinfadi strains were found to evolve significantly slowly  
181 ( $P = 0.0043$  and  $0.0051$ , respectively) because no mutations were detected between  
182 March and June 2020, consistent with the hypothesis of cold-chain related  
183 transmission<sup>27</sup>.  
184  
185 CGB is a powerful tool for identification of global and regional transmission of  
186 mutation-dormant strains as it can determine whether the mutation rate of a specific  
187 strain is significantly lower than the average mutation rate of the entire set of strains.  
188 This lineage-specific reduced mutation rate could be due to a long period of dormancy  
189 caused by the yet to be confirmed cold-chain preservation or other reasons. Among the  
190 330,942 SARS-CoV-2 strains, 7,534 strains were found to evolve significantly slowly  
191 (FDR corrected  $P = 9.68 \times 10^{-9} \sim 0.04$ , Supplemental excel file) and did not mutate  
192 in 100 days. In addition, three closely related variants were found to have no  
193 mutations in 3 months before their descendants were found to widely spread in  
194 Europe in late July 2020 (Figure 4A). Another variant with C3037T, A23403G  
195 (S:D614G), C14408T (ORF1b:P314L), and C241T, emerged in early December 2019.  
196 This variant had 671 identical descendants spreading in six continents between  
197 February 2020 and January 2021, indicating that it has no additional mutations in one  
198 year (Figure 4B). The most ( $582/671 = 86.7\%$ ) of the descendants were found in  
199 Europe and North America. These results (Figures 3 and 4) suggest that the

200 transmission of mutation-dormant variants also plays a major role in COVID-19  
201 pandemic.

202

203 All timely-updated data are freely available at <https://bigd.big.ac.cn/ncov/apis/>. The  
204 desktop standalone version (Figure S10A) provides the full function of CGB and has a  
205 plug-in module for the eGPS software (<http://www.egps-software.net/>)<sup>28</sup>. Although the  
206 web-based CGB is a simplified version (<https://www.biosino.org/genbrowser/> and  
207 <https://bigd.big.ac.cn/genbrowser/>) and designed mainly for educational purpose, it  
208 provides a convenient way to access the data via a web browser, such as Google  
209 Chrome, Firefox, and Safari (Figure S10B, C). The web-based CGB package can be  
210 downloaded and reinstalled on any websites. Nine language versions (Chinese, English,  
211 German, Japanese, French, Italian, Portuguese, Russian, and Spanish) are available.

212

213

## 214 **References**

- 215 1. Zhu, N. *et al.* A novel coronavirus from patients with pneumonia in China, 2019. *N Engl J*  
216 *Med* **382**, 727-733 (2020).
- 217 2. Lu, R. *et al.* Genomic characterisation and epidemiology of 2019 novel coronavirus:  
218 implications for virus origins and receptor binding. *Lancet* **395**, 565-574 (2020).
- 219 3. Wu, F. *et al.* A new coronavirus associated with human respiratory disease in China. *Nature*  
220 **579**, 265-269 (2020).
- 221 4. Portelli, S. *et al.* Exploring the structural distribution of genetic variation in SARS-CoV-2 with  
222 the COVID-3D online resource. *Nat Genet* **52**, 999-1001 (2020).
- 223 5. Fernandes, J.D. *et al.* The UCSC SARS-CoV-2 Genome Browser. *Nat Genet* **52**, 986-991  
224 (2020).
- 225 6. Flynn, J.A. *et al.* Exploring the coronavirus pandemic with the WashU Virus Genome Browser.  
226 *Nat Genet* **52**, 986-1001 (2020).
- 227 7. Hadfield, J. *et al.* Nextstrain: real-time tracking of pathogen evolution. *Bioinformatics* **34**,  
228 4121-4123 (2018).
- 229 8. Sayers, E.W. *et al.* Database resources of the National Center for Biotechnology Information.  
230 *Nucleic Acids Res* **49**, D10-D17 (2021).
- 231 9. Shu, Y.L. & McCauley, J. GISAID: Global initiative on sharing all influenza data - from  
232 vision to reality. *Eurosurveillance* **22**, 2-4 (2017).
- 233 10. Elbe, S. & Buckland-Merrett, G. Data, disease and diplomacy: GISAID's innovative  
234 contribution to global health. *Glob Chall* **1**, 33-46 (2017).
- 235 11. Zhao, W.-M. *et al.* The 2019 novel coronavirus resource. *Hereditas (Beijing)* **42**, 212-221  
236 (2020).

- 237 12. Gong, Z. *et al.* An online coronavirus analysis platform from the National Genomics Data  
238 Center. *Zool Res* **41**, 705-708 (2020).
- 239 13. Chen, F. *et al.* CNGBdb: China National GeneBank DataBase. *Hereditas (Beijing)* **42**,  
240 799-809 (2020).
- 241 14. Zhang, Z. *et al.* Database resources of the National Genomics Data Center in 2020. *Nucleic  
242 Acids Res* **48**, D24-D33 (2020).
- 243 15. Katoh, K. & Standley, D.M. MAFFT multiple sequence alignment software version 7:  
244 Improvements in performance and usability. *Mol Biol Evol* **30**, 772-780 (2013).
- 245 16. Zhou, P. *et al.* A pneumonia outbreak associated with a new coronavirus of probable bat origin.  
246 *Nature* **579**, 270-273 (2020).
- 247 17. Lam, T.T.-Y. *et al.* Identifying SARS-CoV-2-related coronaviruses in Malayan pangolins.  
248 *Nature* **583**, 282-285 (2020).
- 249 18. Hartigan, J.A. Minimum mutation fits to a given tree. *Biometrics* **29**, 53-65 (1973).
- 250 19. Sagulenko, P., Puller, V. & Neher, R.A. TreeTime: Maximum-likelihood phylodynamic  
251 analysis. *Virus Evol* **4**, vex042 (2018).
- 252 20. Zhao, Z.M. *et al.* Moderate mutation rate in the SARS coronavirus genome and its  
253 implications. *BMC Evol Biol* **4**, 21 (2004).
- 254 21. Cotten, M. *et al.* Spread, circulation, and evolution of the Middle East respiratory syndrome  
255 coronavirus. *Mbio* **5**, e01062-13 (2014).
- 256 22. Nie, Q. *et al.* Phylogenetic and phylodynamic analyses of SARS-CoV-2. *Virus Res* **287**,  
257 198098 (2020).
- 258 23. Korber, B. *et al.* Tracking changes in SARS-CoV-2 Spike: Evidence that D614G increases  
259 infectivity of the COVID-19 virus. *Cell* **182**, 812-827 (2020).
- 260 24. Rambaut, A. *et al.* Preliminary genomic characterisation of an emergent SARS-CoV-2 lineage  
261 in the UK defined by a novel set of spike mutations. *virological.org*,  
262 [https://virological.org/t/preliminary-genomic-characterisation-of-an-emergent-sars-cov-2-linea  
263 ge-in-the-uk-defined-by-a-novel-set-of-spike-mutations/563](https://virological.org/t/preliminary-genomic-characterisation-of-an-emergent-sars-cov-2-lineage-in-the-uk-defined-by-a-novel-set-of-spike-mutations/563) (2020).
- 264 25. Xing, Y., Wong, G.W.K., Ni, W., Hu, X. & Xing, Q. Rapid response to an outbreak in Qingdao,  
265 China. *N Engl J Med* **383**, e129 (2020).
- 266 26. Zhang, Y. *et al.* Genomic characterization of SARS-CoV-2 identified in a reemerging  
267 COVID-19 outbreak in Beijing's Xinfadi market in 2020. *Biosaf Health* **2**, 202-205 (2020).
- 268 27. Pang, X. *et al.* Cold-chain food contamination as the possible origin of Covid-19 resurgence in  
269 Beijing. *Natl Sci Rev* **7**, 1861-1864 (2020).
- 270 28. Yu, D. *et al.* eGPS 1.0: comprehensive software for multi-omic and evolutionary analyses.  
271 *Natl Sci Rev* **6**, 867-869 (2019).

272

273



274 **Acknowledgments**

275 We thank Ya-Ping Zhang for providing valuable advices and encouragement and the  
276 researchers who generated and deposited sequence data of SARS-CoV-2 in GISAID,  
277 GenBank, CNGBdb, GWH, and NMDC making this study possible. This work was  
278 supported by a grant from the National Key Research and Development Project (No.  
279 2020YFC0847000).

280

281 **Members of the language translation team**

282 German: Ning He<sup>6</sup>, Jing Lv<sup>6</sup>, Ting Peng<sup>6</sup>

283 Italian: Ting Zhou<sup>6</sup>, Nan Yang<sup>6</sup>, Siyi Hou<sup>6</sup>

284 Portuguese: Huang Li<sup>6</sup>, Jingxuan Yan<sup>6</sup>, Chenglin Zhu<sup>6</sup>, Wenjing Liu<sup>6</sup>

285 Russian: Yuhong Guan<sup>6</sup>, Huanxiao Song<sup>6</sup>

286 Spanish: Qin Zhou<sup>6</sup>, Han Gao<sup>6</sup>, Jinglan He<sup>6</sup>, Tiantian Li<sup>6</sup>, Ruiwen Fei<sup>6</sup>, Shumei Zhang<sup>6</sup>

287 French: Yuyuan Guo<sup>6</sup>

288

289 **Author contributions:** YHP, GQZ, WZ, and HL designed the study; DY, XY, BT,  
290 YHP, JY, JZ, GD, ZQH, HM, LD, GQZ, WZ, and HL wrote the code and developed  
291 CGB; DY, XY, BT, YHP, JY, JZ, GD, ZQH, WH, XS, GQZ, WZ, and HL acquired,  
292 analyzed, and interpreted the data; LM, MZ, YC, GD, TJ, and CL integrated and  
293 curated the source data; members of the language translation team translated CGB  
294 into multiple languages; DY, YHP, JY, JZ, GQZ, WZ, and HL wrote the manuscript.  
295 All authors have approved the submitted version.

296

297 **Competing interests:** The authors declare no competing interests.

298

299 **Data and materials availability:** The coronavirus genomic sequences used in this  
300 study were obtained from the 2019nCoV database<sup>11</sup>. Timely updated data of genomic  
301 sequences of SARS-CoV-2 variants are shared with the general public at  
302 <https://bigd.big.ac.cn/ncov/apis/>. The free software (desktop and web-based versions)  
303 can be downloaded from <http://www.egps-software.net/>.

304

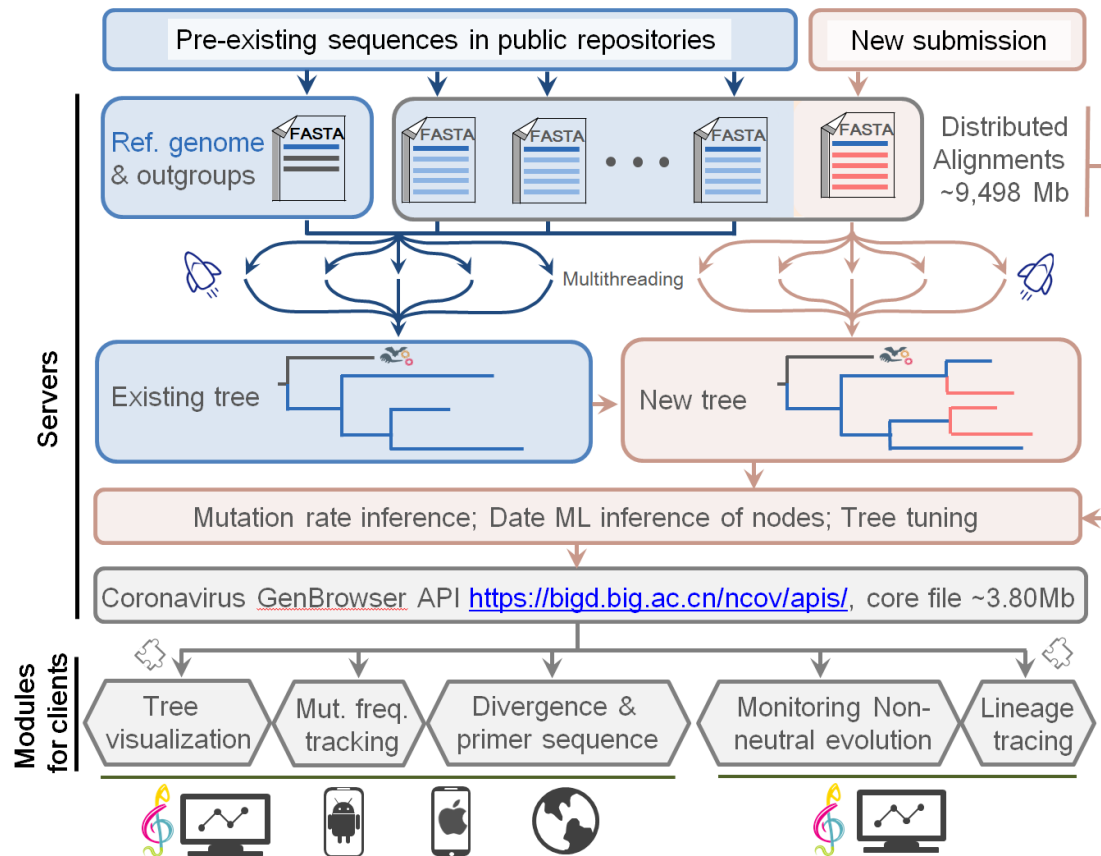

305

306

307 **Figure 1. Timely updates of SARS-CoV-2 genomic data and visualization**

308 **framework of Coronavirus GenBrowser.** The core file includes the pre-analyzed

309 genomic data of SARS-CoV-2 variants and the associated metadata. All

310 timely-updated data can be freely accessed at <https://bigd.big.ac.cn/ncov/apis/>.

311

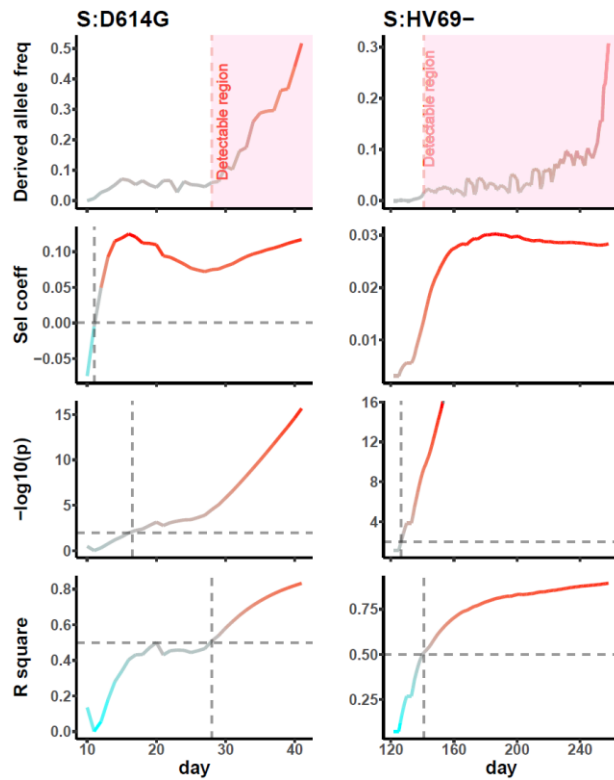

312

313

314 **Figure 2. Putative advantageous variants of SARS-CoV-2.** The  $x$ -axis displays  
315 number of days since the first appearance of derived allele in the global viral population.  
316 Predicted adaptation is marked in pink. Dashed gray crossings denote top right corners  
317 with a positive selection coefficient,  $p < 0.01$ , and  $R^2 > 50\%$ .

318

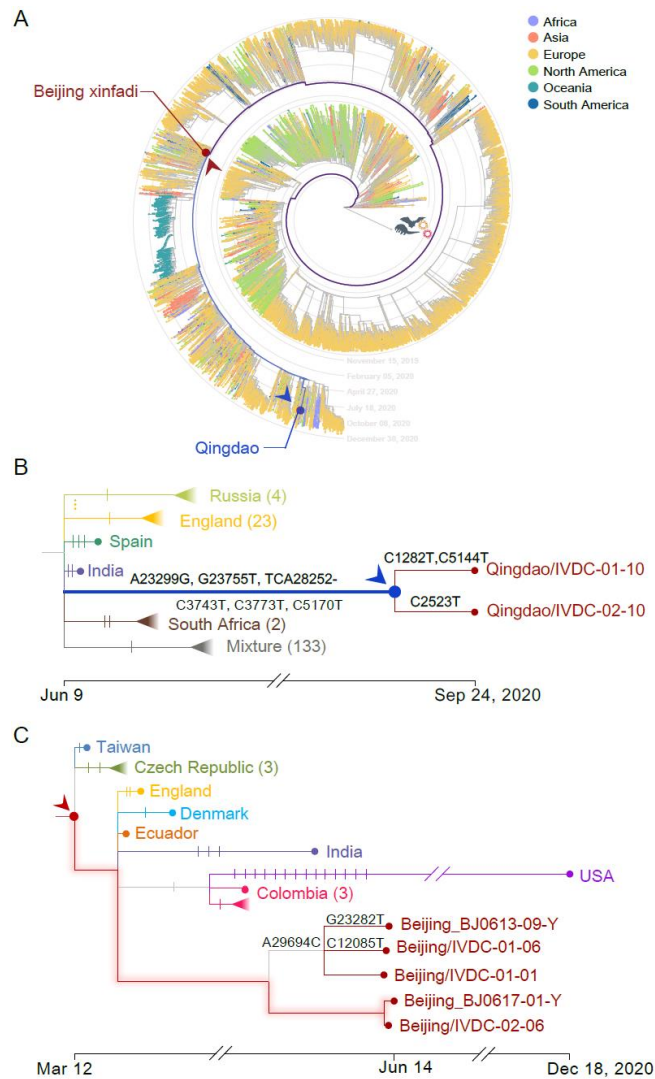

319

320 **Figure 3. Global and zoom-in views of lineages associated with Qingdao and**  
 321 **Beijing outbreaks.**

322 A) The lineages of traced targets are shown in blue and dark red lines.

323 B) Qingdao/IVDC-01-10 and Qingdao/IVDC-02-10 were the two SARS-CoV-2  
 324 strains collected on September 24, 2020 from two dock workers in Qingdao,  
 325 China. The query strain (env/Qingdao/IVDC-011-10) was found on an outer  
 326 packaging of cold-chain products on October 7, 2020. The environmental strain,  
 327 marked with a blue solid circle with an arrowhead, was found to be identical to the  
 328 most recent common ancestor of the two strains from the two dock workers. Each  
 329 notch of the branches represents a mutation. Mutations of the Qingdao strains are  
 330 indicated.

331 C) The ancestral viral strain found in early March 2020 is marked with a dark-red  
 332 solid circle and an arrowhead. This strain is identical to the two strains  
 333 (Beijing/IVDC-02-06 and Beijing/BJ0617-01-Y) collected from two Xinfadi cases  
 334 on June 11 and 14, 2020. The branches with no mutations are highlighted.

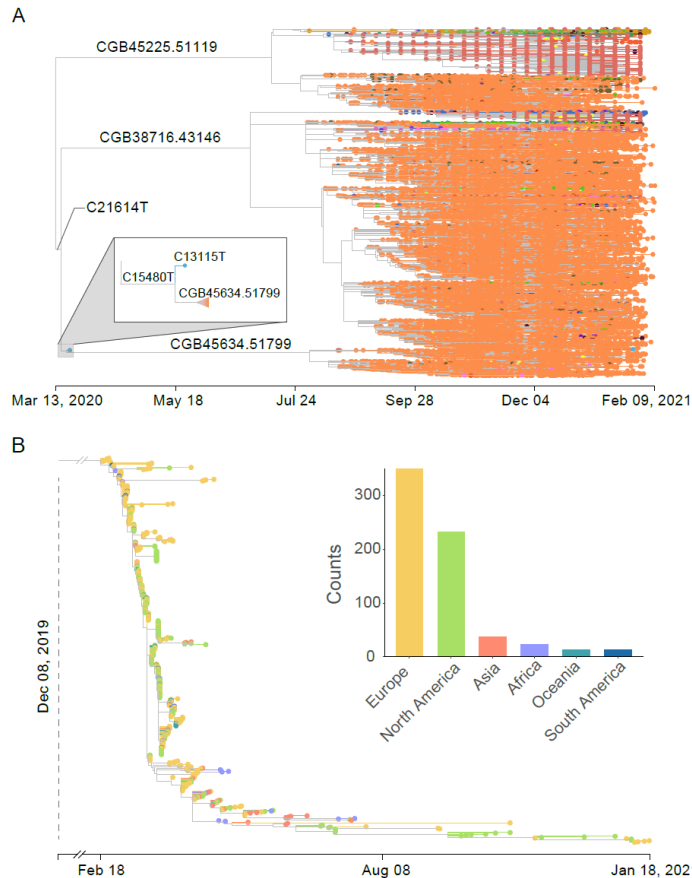

335

336 **Figure 4. Transmission of mutation-dormant SARS-CoV-2 variants.**

337 A) Tree visualization of strains of three related lineages with ~~the~~ reduced evolutionary  
 338 rate among 330,942 SARS-CoV-2 genomic sequences. There were no mutations in  
 339 the strains of three long branches (CGB45225.51119, CGB38716.43146, and  
 340 CGB45634.51799) in 118, 112, and 135 days, respectively. The numbers of their  
 341 descendants were 9,815, 28,126, and 3,015, respectively. The three strains had  
 342 spread to more than 10 European countries, and most descendants were found in  
 343 Denmark (red tip) and UK (orange tip). Variants of these three lineages shared 13  
 344 mutations (G204T, C241T, T445C, C3037T, C6286T, C14408T, G21255C,  
 345 C22227T, A23403G, C26801G, C27944T, C28932T, and G29645T) but had two  
 346 unique mutations (C21614T and C15480T).

347 B) Tree visualization of 671 strains with no mutations between December 8, 2019 and  
 348 January 18, 2021. These strains are the descendants of a variant with four  
 349 mutations (C3037T, A23403G, C14408T, and C241T) emerged before December  
 350 8, 2019. Among the four mutations, A23403G (S:D614G) and C14408T  
 351 (ORF1b:P314L) are non-synonymous. The geographic distribution of the  
 352 descendants is shown in the subpanel. Their siblings with additional mutations  
 353 (16,442 strains) are not shown in the evolutionary tree. The CGB ID of their  
 354 MRCA is CGB121.124.
