# Supplementary material for: Coronavirus GenBrowser for monitoring the transmission and evolution of SARS-CoV-2
Source: bioRxiv or medRxiv preprint supplement (doi:10.1101/2020.12.23.20248612), 2021-10-19
Supplement: Supplementary file [file media-1.pdf]

1 Supplemental methods and materials

2

3

4 **Coronavirus GenBrowser for monitoring the transmission and evolution of**  
5 **SARS-CoV-2**

6

7 Dalang Yu<sup>2,7,†</sup>, Xiao Yang<sup>2,5,†</sup>, Bixia Tang<sup>1,†</sup>, Yi-Hsuan Pan<sup>3,†</sup>, Jianing Yang<sup>2,7,†</sup>,  
8 Guangya Duan<sup>1,7,†</sup>, Junwei Zhu<sup>1</sup>, Zi-Qian Hao<sup>2,7</sup>, Hailong Mu<sup>2</sup>, Long Dai<sup>2,5</sup>, Wangjie  
9 Hu<sup>2,7</sup>, Mochen Zhang<sup>1,7</sup>, Ying Cui<sup>1,7</sup>, Tong Jin<sup>1,7</sup>, Cui-Ping Li<sup>1</sup>, Lina Ma<sup>1</sup>, Language  
10 translation team<sup>6</sup>, Xiao Su<sup>4</sup>, Guoqing Zhang<sup>2,7,\*</sup>, Wenming Zhao<sup>1,7,\*</sup>, Haipeng Li<sup>2,7,\*</sup>

11

12 <sup>1</sup>National Genomics Data Center, Beijing Institute of Genomics (China National  
13 Center for Bioinformation), Chinese Academy of Sciences, Beijing 100101,  
14 China.

15 <sup>2</sup>National Genomics Data Center, Bio-Med Big Data Center, CAS Key Laboratory  
16 of Computational Biology, Shanghai Institute of Nutrition and Health, Chinese  
17 Academy of Sciences, Shanghai 200031, China.

18 <sup>3</sup>Key Laboratory of Brain Functional Genomics of Ministry of Education, School of  
19 Life Science, East China Normal University, Shanghai 200062, China.

20 <sup>4</sup>Institut Pasteur of Shanghai, Chinese Academy of Sciences, Shanghai 200031,  
21 China.

22 <sup>5</sup>Shanghai Shenyong Biotechnology Co. LTD, Shanghai 201315, China.

23 <sup>6</sup>Beijing Language and Culture University, Beijing 100083, China.

24 <sup>7</sup>University of Chinese Academy of Sciences, Chinese Academy of Sciences,  
25 Beijing 100101, China.

26

27 †Joint Authors.

28 \* To whom correspondence should be addressed. Tel: +86-21-54920460; Email:

29 lihaipeng@picb.ac.cn. Correspondence may also be addressed to:

30 gqzhang@picb.ac.cn; zhaowm@big.ac.cn.

31

32

33

34 **Table of Contents**

35 Data quality control.....3

36 Distributed genome alignments .....4

37 Ancestral alleles of SARS-CoV-2 .....5

38 Construction of the evolutionary tree based on distributed alignments.....5

39 Imputation of ambiguous and missing nucleotides.....6

40 Parsimony inference of mutations for strains in each branch .....7

41 Maximum-likelihood phylodynamic analysis.....7

42 Maximum-likelihood analysis based on the existing mutation-annotated tree.....9

43 Tree visualization with CGB .....10

44 Coordinated annotation tracks .....11

45 Data searching, filtering, and visualization of a single clade on the huge tree.....13

46 CGB binary nomenclature for each internal node or branch .....14

47 Estimation of mutation rate.....15

48 Mutations affected by recombination .....15

49 Identification of mutation cold spots .....16

50 Detection of on-going selection of SARS-CoV-2 .....17

51 References.....22

52

53

54

55 **Data quality control**

56 SARS-CoV-2 genomic sequences were obtained from the 2019nCoV database[1]  
57 established by China National Center for Bioinformatics (CNCB). Detailed  
58 information on this database is available at  
59 [https://bigd.big.ac.cn/ncov/release\\_genome](https://bigd.big.ac.cn/ncov/release_genome). All SARS-CoV-2 isolates are from  
60 humans. To obtain high-quality SARS-CoV-2 genomic sequences, quality control  
61 measures were applied (Figure S1).  
62

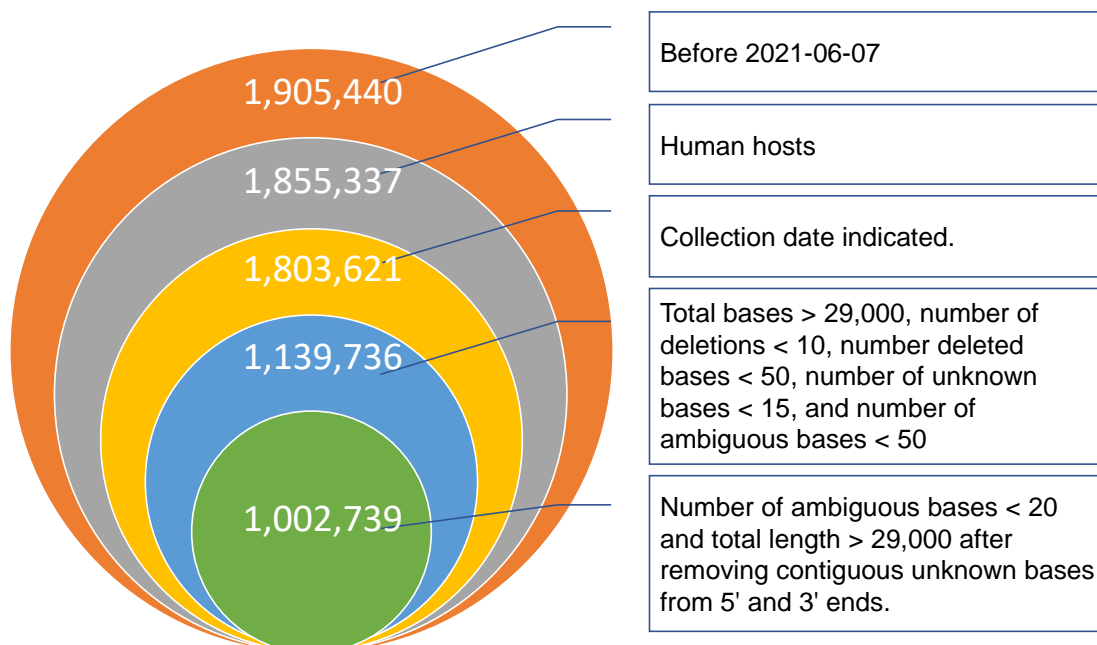

63  
64 **Figure S1. Quality control pipeline.** The value in each circle is number of sequences  
65 identified in the quality control performed on 7 June, 2021.

66  
67 The following criteria were used to select high quality sequences. First, the collection  
68 date of each strain is indicated. Second, the sequence length is longer than 29,000  
69 bases, and the genome contains all protein-coding genes. Third, a gap found by  
70 sequence alignment is considered as one deletion, the number of deletions is <10, and  
71 the number of deleted bases is < 50. Forth, the number of unknown bases (Ns) is < 15,  
72 and the number of ambiguous bases (Ds) is < 50. Fifth, the length of the genome is  
73 longer than 29,000 bases after removing contiguous unknown bases from 5' and 3'  
74 ends. Sixth, as analysis of 23,336 genomes revealed that 5% of the genomes contain  
75 more than 19 ambiguous (Ds) and unknown (Ns) bases, a high-quality sequence must  
76 have a total number of ambiguous and unknown bases < 20.  
77

78 After applying these criteria, 1,002,739 high-quality genomic sequences were  
79 identified and used for subsequent analyses, unless noted otherwise. The number of  
80 identified high- and low-quality genomes in each month is shown in Figure S2.  
81

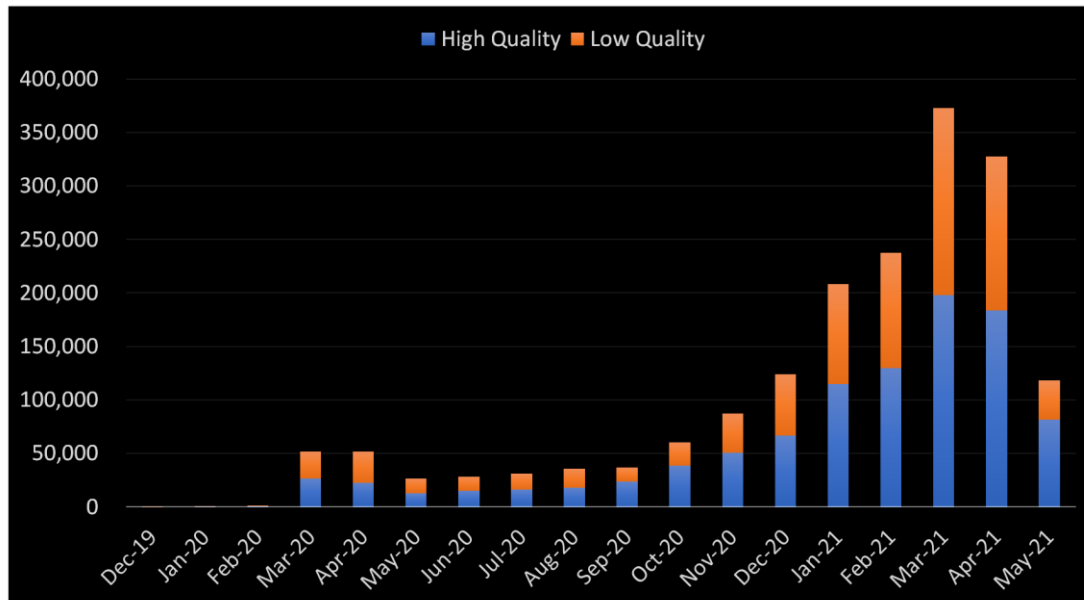

82  
83 **Figure S2. Number of high- and low-quality SARS-CoV-2 genomic sequences at**  
84 **various time points.**

### 85 **Distributed genome alignments**

86 Genome alignment was performed using the software MAFFT[2] with parameters  
87 “--auto --addfragments” after dividing input sequences into reference (GenBank  
88 accession number: NC\_045512)[3] and others. Because of the explosion in  
89 SARS-CoV-2 genomic data, it is nearly impossible to perform daily update with the  
90 currently available analysis framework. To solve this problem, the distributed  
91 alignment system was developed (Figure 1), which reduces the total alignment time  
92 complexity to  $\mathcal{O}(n)$ , where  $\mathcal{O}(\cdot)$  is a linear function, and  $n$  is number of viral  
93 strains. In this study, each alignment contained approximately 5,000 genomic  
94 sequences, including the reference SARS-CoV-2 sequence (NC\_045512)[3]. To  
95 generate the outgroup alignment file, the reference sequence (NC\_045512)[3] was  
96 aligned with the sequences of two outgroups: bat coronavirus RaTG13[4] and  
97 pangolin coronavirus PCoV-GX-P1E[5].

## 98 **Ancestral alleles of SARS-CoV-2**

99 In total, 272 SARS-CoV-2 strains were collected before 31 January, 2020. These  
100 strains were collectively named “early samples” in this study. To detect ancestral  
101 alleles, the region between nucleotide positions 100 and 29,800 of each genome was  
102 examined. Compared to the reference sequence (NC\_045512)[3], 28,846  
103 monomorphic and 855 polymorphic sites were detected in the genomes of early  
104 samples, and the ancestral alleles for those sites are determined. Upon further  
105 comparison with the sequences of the two outgroups (RaTG13 and PCoV-GX-P1E)[4,  
106 5], the majority of major alleles in 827 (96.7%) of the 855 polymorphic sites were  
107 found to be identical to the alleles in the outgroup genomes. Among the 28 unique  
108 polymorphic sites, minor alleles in 26 sites were found to be rare with a frequency  
109 less than 0.06, suggesting that the major alleles in these 26 sites in the early samples  
110 are ancestral. The frequencies of two major alleles *8,782C* and *28,144T* are 0.684 and  
111 0.640, respectively. The minor alleles are *8,782T* and *28,144C*. Examination of seven  
112 SARS-CoV-2 strains collected in December 2019 revealed that they all carry these  
113 two major alleles, suggesting that they are ancestral alleles. On the evolutionary tree,  
114 the most recent common ancestor (MRCA) of SARS-CoV-2 is located at the root of  
115 the tree and found to harbor all of these ancestral alleles. The sequence between  
116 nucleotide position 100 and 29,800 of MRCA was found to be identical to that of the  
117 reference genome sequence (GenBank accession number: NC\_045512)[3]. The  
118 finding is consistent with that of a previous study.[6]

## 119 **Construction of the evolutionary tree based on distributed alignments**

120 To build the evolutionary tree, the sequence corresponding to the reference sequence  
121 between nucleotides 100 and 29,800 of each genome was used. Initially, the tree was  
122 built using the software FastTree[7] and a slightly revised version of RAxML[8]. To  
123 accommodate the entire length of each SARS-CoV-2 genome, the minimum branch  
124 length was changed from  $10^{-5}$  to  $10^{-10}$  in RAxML. However, these two methods  
125 were later found to be unsatisfactory because both FastTree and RAxML cannot  
126 analyze distributed alignments and sub-genomic regions. Furthermore, to use  
127 FastTree and RAxML, a unified multiple sequence alignment must be done for daily  
128 updates. This is beyond the capability of our computing facility. FastTree and  
129 RAxML also cannot distinguish missing bases from indels because both appear as “-”  
130 in the alignments. As gaps are ignored by these two methods and indels provide  
131 valuable information for construction of phylogenetic tree of closely related  
132 SARS-CoV-2 strains, new approaches are needed to accomplish the task. To simplify  
133 CGB implementation, the Neighbor-Joining method[9] was used.

134

135 When calculating genetic distances, five different features are considered. First,  
136 missing bases at 5' and 3' ends (presented as gaps in alignments) are ignored. Second,  
137 insertions and deletions are taken into consideration. Third, IUPAC (International  
138 Union of Pure and Applied Chemistry) ambiguous nucleotide characters (e.g., Y and  
139 R) are supported. As disambiguating nucleotides will generate a huge number of  
140 artificial sequences, genetic distances would be overestimated if all possible  
141 sequences are compared.

142

143 To solve this problem, the following strategy was used to treat ambiguous bases. For  
144 comparison of the sequence ACGRRCG with the reference sequence ACGRACG,  
145 ACGRRCG is converted to ACGRACG and ACGRGCG. The resulting 2 new sequences  
146 are defined as one sequence set. Because this sequence set has the sequence  
147 ACGRACG that is the same as that of the reference sequence, the strain with the  
148 sequence ACGRRCG is considered as the same type as the strain with the reference  
149 sequence ACGRACG. For comparison of the sequence ACGRRCG with the sequence  
150 ACGRYCG, ACGRRCG is converted to ACGRACG and ACGRGCG, and ACGRYCG is  
151 converted to ACGRCCG and ACGRTCG. Therefore, two sequence sets are generated.  
152 Because the four sequences in these two sequence sets are different, the strain with  
153 the sequence ACGRRCG and the one with the sequence ACGRYCG are considered as  
154 two different types. For comparison of the sequence ACGRRCG with the sequence  
155 ACGRHCG, ACGRRCG is converted to ACGRACG and ACGRGCG, and ACGRHCG is  
156 converted to ACGRACG, ACGRCCG and ACGRTCG. As the resulting two sequence sets  
157 share the same sequence ACGRACG, the strain with the sequence ACGRRCG and the  
158 one with the sequence ACGRHCG are considered as the same type.

159

160 Forth, the sequences of two genomes for comparison are placed in different  
161 alignments, and the sequence of the reference genome is used as the coordinate for  
162 nucleotide positions. Fifth, the genetic distance between outgroups and a  
163 SARS-CoV-2 strain is determined after adding two components: the average genetic  
164 distance between outgroups and the most recent common ancestor (MRCA), and the  
165 genetic distance between MRCA and the strain.

## 166 **Imputation of ambiguous and missing nucleotides**

167 An ambiguous or missing base can be imputed (Figure S3) if the strain with the  
168 ambiguous base shares the same phylogeny with neighboring lineages[10]. For this  
169 imputation, the allele frequency and the definition of IUPAC ambiguous nucleotide  
170 characters are considered, and only the lineages with collection dates  $\pm 30$  days apart  
171 are compared.

172

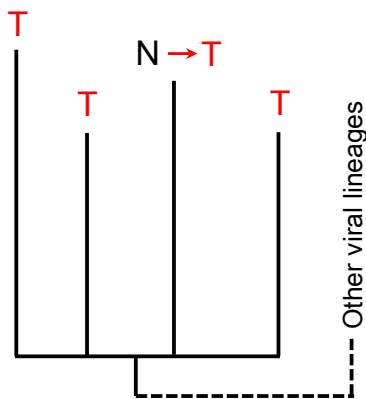

173

174 **Figure S3. Imputation of ambiguous nucleotides of a lineage using the**  
 175 **information of its siblings.**

176 **Parsimony inference of mutations for strains in each branch**

177 After ambiguous and missing nucleotides are replaced with inferred nucleotides,  
 178 mutations in strains of each branch are recapitulated according to the principle of  
 179 parsimony[11, 12]. Although the analysis is performed site by site, large deletions  
 180 spanning over a number of regions are merged as a single large deletion, and a long  
 181 insertion is considered as a united element. Thus it is easy to trace recurrent  
 182 deletions[13] whenever necessary.

183 **Maximum-likelihood phylodynamic analysis**

184 A highly effective maximum-likelihood method (TreeTime) is used to determine the  
 185 dates of internal nodes[14] as it allows fast inference by “the post- and pre-order  
 186 traversals” with tabulated key values for back tracing. This algorithm was  
 187 implemented in CGB with very minor revisions. The genome-wide mutation rate is  
 188 also timely updated to calculate the likelihood.

189

190 As recommended by TreeTime[14], all length zero branches are pruned, and branch  
 191 length corresponds to number of mutations on the branch. To improve computation  
 192 efficiency, CGB first categories branches with length zero according to its context  
 193 (Figure S4). In some cases, branches with length zero are not pruned (Figure S4A, E)  
 194 in order to make length zero offspring as a clade and to reduce the number of  
 195 multifurcated nodes.

196

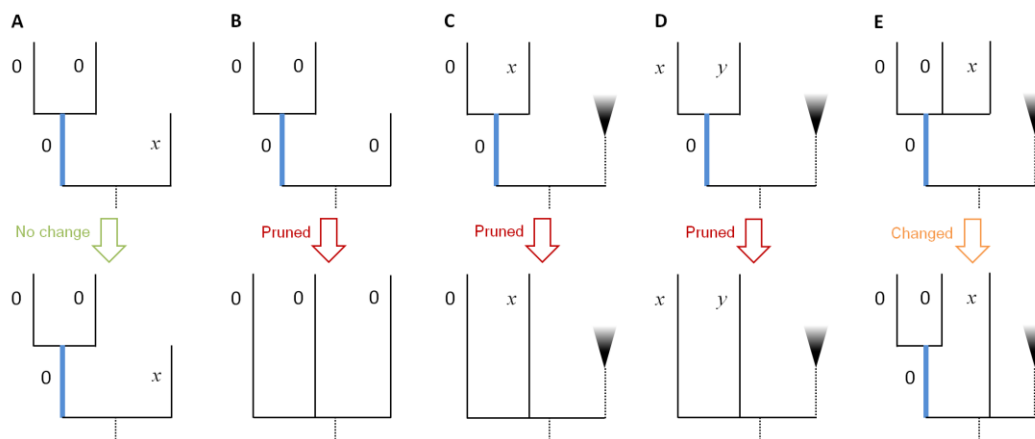

198

199

200 **Figure S4. Five categories of length zero branches (highlighted in blue).**

201 A) All offspring of the branch have length zero, and the sister branch of the branch  
 202 has length non-zero  $x$ . In this case, the two offspring of length zero are in the same  
 203 clade.

204 B) The sister branch has length zero, and the three nodes are clustered to form a  
 205 multifurcated clade.

206 C) If one offspring of the branch has length zero, the branch is pruned.

207 D) If all offspring of the branch have length non-zero  $x$  or  $y$ , the branch is pruned.

208 E) If two or more offspring of the branch have length zero, the branch is kept and the  
 209 non-zero branch is removed.

210

211

212 Many internal nodes are multi-furcated instead of bi-furcated because the viral strains  
 213 are very similar to each other. The multi-furcated nodes are known as polytomies. To  
 214 reduce the number of branches of a polytomous node, CGB sorts the branches  
 215 according to the potential gain of likelihood if branches are shortened and determines  
 216 whether a longer or shorter branch length would increase the likelihood of tree. The  
 217 branches are bi-partitioned to form a new clade (Figure S5), and the two sets of  
 218 branches are determined by maximizing the gain of likelihood. The bi-partition  
 219 always starts from the root to the tips, and this process is repeated at least four times.

220

221

222



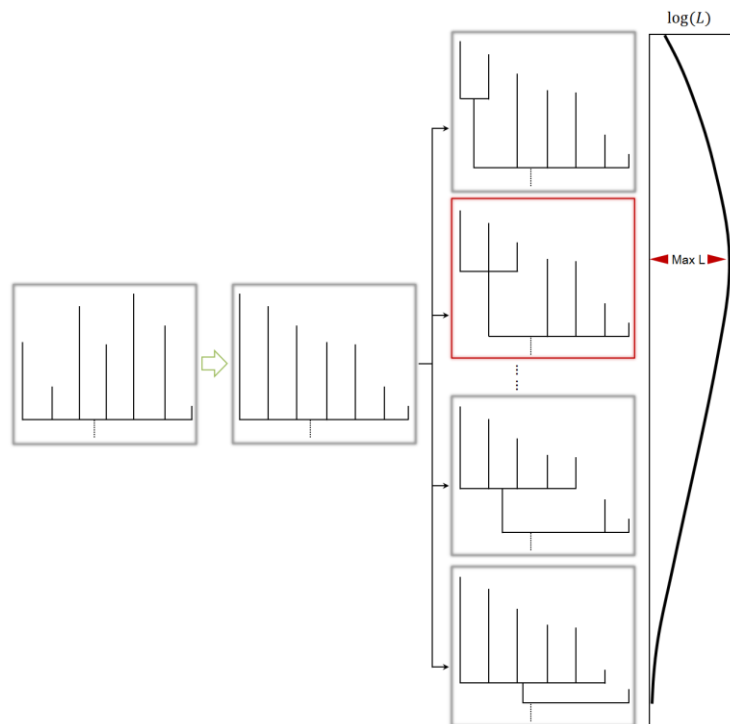

223  
224  
225  
226  
227  
228

**Figure S5. Bi-partition of a polytomic node.** CGB first sorts the branches according to the potential gain of likelihood. If  $k$  branches are linked to the node, there are  $k - 2$  different ways to bi-partition the node. The two sets of branches are determined by maximizing the gain of likelihood.

229 **Maximum-likelihood analysis based on the existing mutation-annotated tree**

230 Branch and bound for maximum parsimony[15, 16] is implemented with a speed-up  
231 revision. New genomic sequences of SARS-CoV-2 strains are first aligned with the  
232 reference genome (Figure 1). The resulting alignment and previous results are then  
233 analyzed together, and the evolutionary tree is rebuilt using previous result file that  
234 contains the existing tree and mutation information. A new strain is then added to the  
235 mutation-annotated tree as a dated leaf, and new mutations are labeled and analyzed  
236 according to the principle of parsimony. CGB adds the earliest strain first to the tree.  
237 After adding all new genomic sequences, the mutation rate of SARS-CoV-2 is  
238 calculated, and the date of each internal node is determined as described above. This  
239 maximum-likelihood (ML) analysis was performed with a slightly revised version of  
240 TreeTime[14].

241  
242  
243  
244  
245

The speed-up-revised branch and bound provides a balance between efficiency and accuracy. However, it may not be globally optimized. To solve this problem, a sub-tree optimization is performed. As many internal branches have five or more mutations, the large evolutionary tree was divided into small subtrees. Because

246 sub-tree optimization is much faster than rebuilding the whole tree, it is frequently  
247 performed as needed.  
248

249 **Tree visualization with CGB**

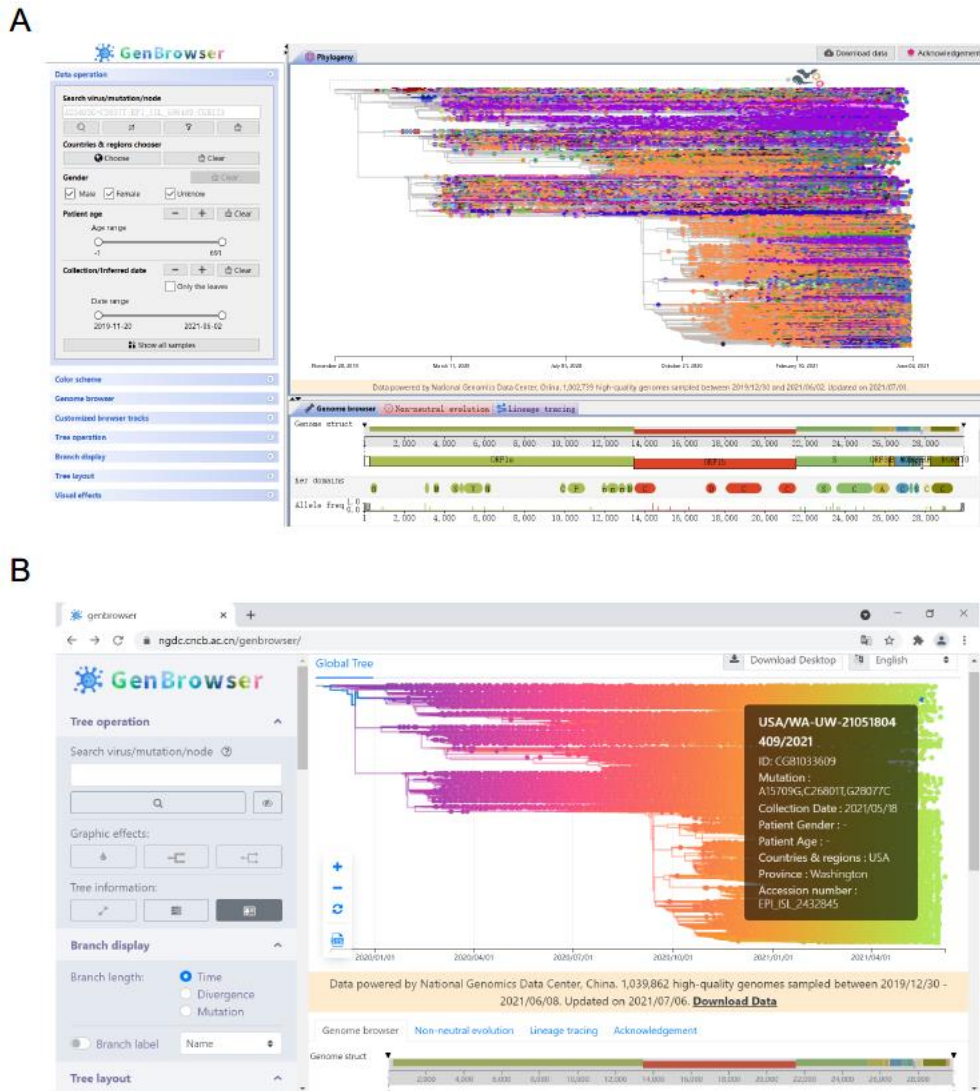

250  
251 **Figure S6. Tree visualization with the CGB.**  
252 A) Tree visualization in desktop version of CGB.  
253 B) Tree visualization in web-based CGB. Nine language versions (Chinese, English,  
254 German, Japanese, French, Italian, Portuguese, Russian, and Spanish) are  
255 available.  
256

257 **Table S1. Computation time for the rendering process ( $n=1,002,739$ ) in two**  
 258 **operation systems.**  
 259

| Operating System                                   | Replicate | Calculation (ms) | First painting (ms) | Next paintings (ms) |
|----------------------------------------------------|-----------|------------------|---------------------|---------------------|
| MacOS Catalina 10.15.7                             | 1         | 292              | 696                 | 201                 |
| 2.6 GHz four core Intel Core i7                    | 2         | 235              | 709                 | 200                 |
| 16 GB 1600 MHz DDR3                                | 3         | 293              | 762                 | 203                 |
| NVIDIA GeForce GT 750M 2 GB/Intel Iris Pro 1536 MB | 4         | 236              | 691                 | 201                 |
| Windows 10 Home version                            | 1         | 290              | 386                 | 238                 |
| 8GB RAM                                            | 2         | 235              | 323                 | 206                 |
| Intel(R) Core(TM) i5-8250U                         | 3         | 298              | 376                 | 197                 |
| CPU @ 1.60GHz 1.80 GHz                             | 4         | 297              | 364                 | 250                 |
| Intel(R) UHD Graphics 620                          |           |                  |                     |                     |

260

261 **Coordinated annotation tracks**

262 CGB uses six tracks to show genome structure and key domains, allele frequencies,  
 263 sequence similarity, multi-genome alignment and primer sets for detection of  
 264 SARS-CoV-2 (Figure S7). These tracks are coordinated according to nucleotide  
 265 positions of the SARS-CoV-2 reference genome.

266

267 The first track shows the structure of a SARS-CoV-2 genome. By dragging or right  
 268 clicking the mouse, a genomic region can be zoomed in. The second track shows 25  
 269 known key domains. By right clicking on a domain box, amino acid sequence of the  
 270 domain can be copied, and the related information page on the Pfam website  
 271 (<http://pfam.xfam.org>) can be opened.

272

273 The third track shows the frequencies of derived alleles or variants (Figure S7). Since  
 274 the web version is designed for the general public and quick view of global samples,  
 275 users can update manually the frequency of an allele in the chosen clade. When  
 276 hovering mouse on the frequency column of an allele, its allele frequency trajectory  
 277 (Figure S8) will pop up. This allele frequency trajectory is calculated by a sliding  
 278 window of five days in size. The person who first discovered the allele is indicated  
 279 below allele frequency trajectory.

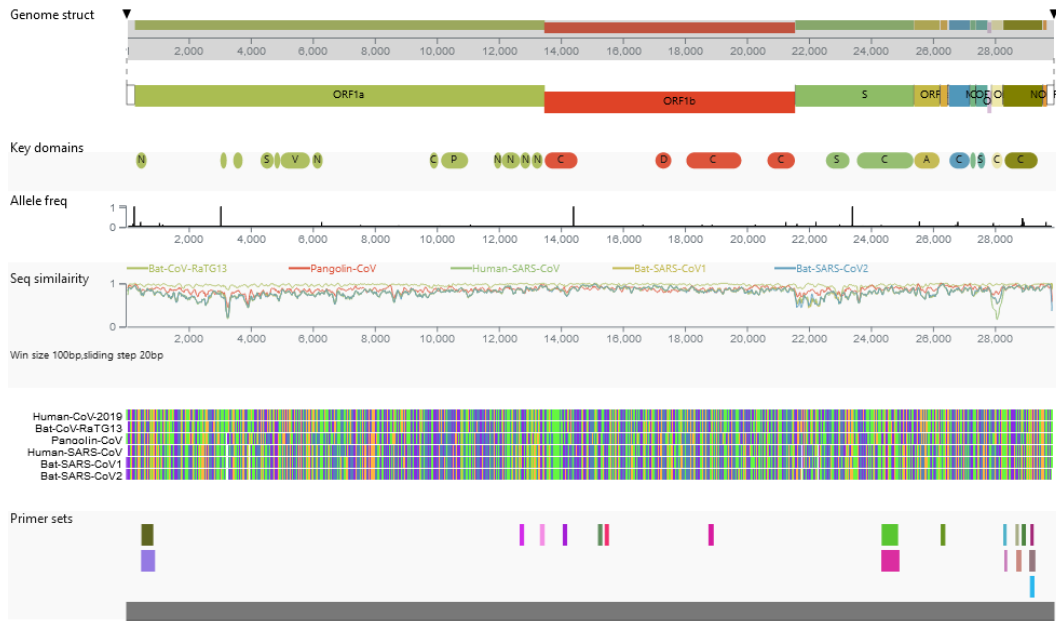

280  
281  
282

**Figure S7. Six tracks shown by the Coronavirus GenBrowser.**

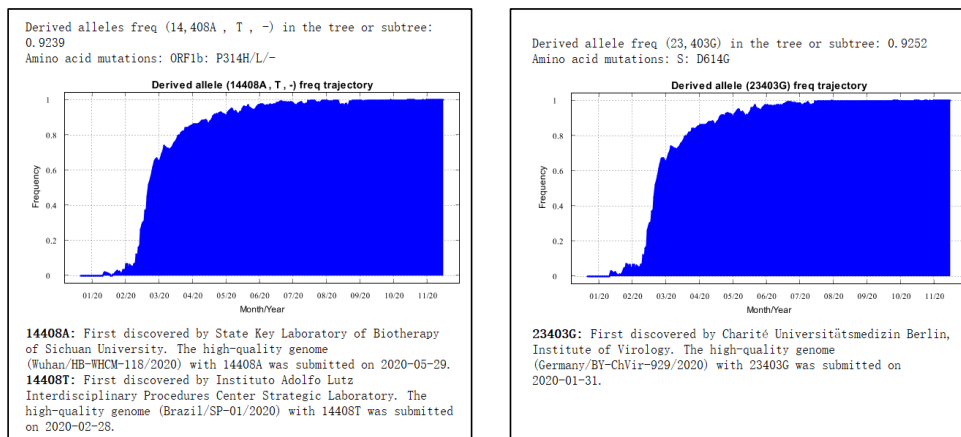

283  
284  
285  
286  
287  
288  
289  
290  
291  
292  
293  
294  
295  
296

**Figure S8. Visualization of allele frequency trajectory with CGB.**

The fourth track shows sequence similarity between SARS-CoV-2 reference genome (NC\_045512.2)[3] and the genomes of five other coronaviruses, including bat-CoV-RaTG13 (MN996532.1)[4], pangolin-CoV (MT040334.1)[5], human-SARS-CoV (AY278488.2)[17], bat-SARS-CoV1 (KY417146.1)[18], and bat-SARS-CoV2 (MK211376.1)[19]. Sequence similarity is determined using a sliding window (window size 100 bases and sliding step 20 bases). In the standalone version of CGB, these parameters can be adjusted to re-calculate the degree of sequence similarity.

The fifth track shows alignments of six coronaviruses performed with the software MAFFT[2]. Nucleotide sequences of five coronaviruses are coordinated according to

297 nucleotide positions of the SARS-CoV-2 reference genome. Inserted sequences, if any,  
 298 in the genomes of the five non-SARS-CoV-2 coronaviruses can be viewed with the  
 299 standalone version of CGB (Figure S9).

300

301 The sixth track presents primer sets that can be used to detect various SARS-CoV-2  
 302 genes or strains. Various regions of the genome that can be amplified are indicated.  
 303 Combined with allele frequency information, the efficiency of nucleic acid testing can  
 304 be verified (Figure S10). Since viral strains can be filtered according to collection  
 305 dates and locations, their allele frequency can be easily determined.

306

307

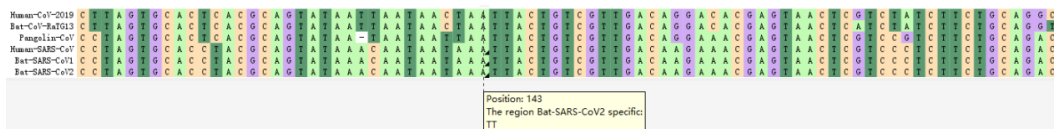

308

309 **Figure S9. Multiple-genome alignment.** Inserted sequences in the five  
 310 non-SARS-CoV-2 genomes are marked with black triangles. This alignment can be  
 311 downloaded from <https://bigd.big.ac.cn/ncov/apis/>.

312

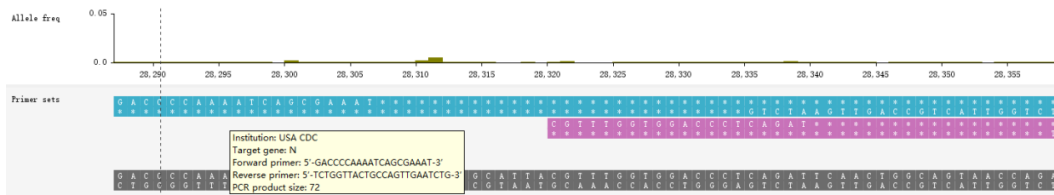

313

314

315 **Figure S10. Combined view of two tracks of allele frequency and primer set for**  
 316 **detection of various SARS-CoV-2 strains.** The nucleotide sequences of two primers  
 317 are shown, and their amplified region is marked in pink.

318

319 **Data searching, filtering, and visualization of a single clade on the huge tree**

320 To view a lineage on the huge evolutionary tree, several different data searching and  
 321 filtering methods can be used. A clade can be viewed in a new tab, and its sub-clade  
 322 can be viewed in another new tab. A clade can also be collapsed or un-collapsed.  
 323 Moreover, chosen lineages can be made visible, and un-chosen ones can be hidden.  
 324 After right clicking a branch, a menu will pop up to help navigate through the huge  
 325 tree. A lineage can also be viewed by deep zoom-in using the desktop standalone  
 326 version of CGB (Figure 2A). However, the deep zoom-in function is not implemented  
 327 in the web-based CGB because it is a simplified version and is designed mainly for  
 328 educational purpose.

329 CGB binary nomenclature for each internal node or branch

330 To name each internal node or branch, the CGB binary nomenclature system was  
331 developed following the MRCA concept as follows. Each node of a viral strain is first  
332 assigned a permanent unique positive integer (e.g., 1 – 9) in the order of discovery  
333 (Figure S11). Assuming that an internal node has two sub-nodes that are named  
334 CGB1 and CGB2, this internal node is named CGB1.2. For an internal node with  
335 more than two sub-nodes, e.g., CGB7, CGB9, and CGB6, it is named with the two  
336 smallest CGB numbers, given the condition that the internal node is the MRCA of the  
337 two sub-nodes, separated by a dot; thus, this internal node is designated as CGB6.7.

338

339 This naming process is very fast, and all nodes of the huge evolutionary tree can be  
340 named in seconds. Each node can be easily searched and viewed by CGB. When a  
341 new sequence is added to the tree as a sub-node, its CGB number would be greater  
342 than all the pre-existing CGB numbers and thus will not change the previously  
343 assigned CGB number of the internal node, which the new sequence belongs.  
344

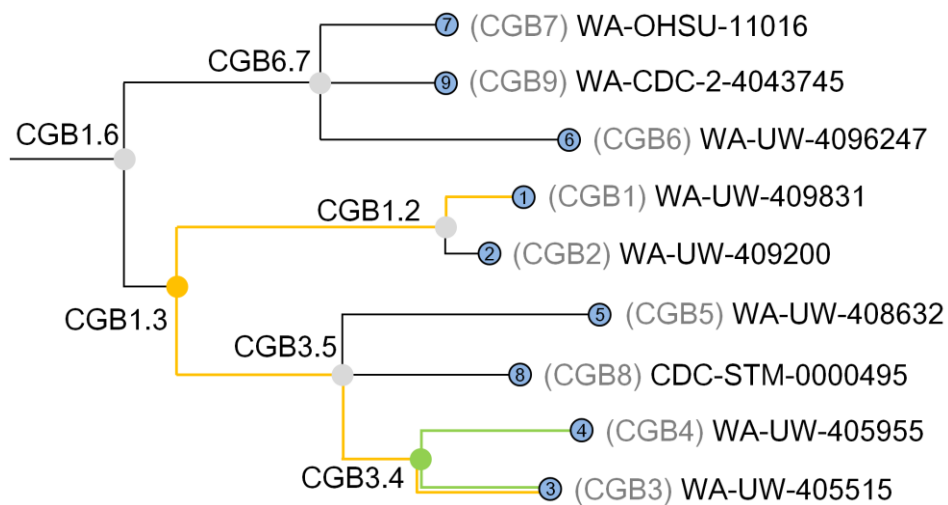

345

346

347 **Figure S11. Illustration of CGB binary nomenclature.** The evolutionary tree is  
348 shown with nine strains indexed CGB1 – CGB9. Their pseudo-isolate names are  
349 shown. The green internal node with two sub-nodes named CGB3 and CBG4 is  
350 designated as CGB3.4 since the MRCA of CGB3 and CGB4 is the green node. For an  
351 internal node with more than two sub-nodes, it is named with the two smallest CGB  
352 numbers, given the condition that the internal node is the MRCA of the two sub-nodes,  
353 separated by a dot. Therefore, an orange internal node is named CGB1.3 because it  
354 contains CGB1, CGB2, CGB5, CGB8, CGB4, and CGB3 with CGB1 and CGB3  
355 being the smallest CGB numbers, on the condition just described.

356 **Estimation of mutation rate**

357 The 95% confidence interval of the estimated mutation rate is obtained via  
358 Monte-Carlo simulations. Given the estimated mutation rate, mutations are randomly  
359 generated along the evolutionary tree[20], and mutation rate is estimated by  
360 regression analysis. Then the empirical distribution of estimated mutation rate is  
361 obtained from 1,000 simulated data set.

362

363

364 **Table S2. Mutation rate of various SARS-CoV-2 genes.**

365

| SARS-CoV-2 Gene | Mutation rate (per nucleotide per year) |
|-----------------|-----------------------------------------|
| ORF1a           | $5.9704 \times 10^{-4}$                 |
| ORF1b           | $4.774 \times 10^{-4}$                  |
| S               | $2.4343 \times 10^{-3}$                 |
| ORF3a           | $3.2810 \times 10^{-5}$                 |
| E               | $5.4687 \times 10^{-5}$                 |
| M               | $1.0794 \times 10^{-3}$                 |
| ORF6            | $1.6243 \times 10^{-4}$                 |
| ORF7a           | $6.7185 \times 10^{-4}$                 |
| ORF7b           | $4.5438 \times 10^{-4}$                 |
| ORF8            | $9.4007 \times 10^{-3}$                 |
| N               | $4.9052 \times 10^{-3}$                 |
| ORF10           | $1.0794 \times 10^{-3}$                 |
| noncoding       | $3.5758 \times 10^{-3}$                 |

366

367 **Mutations affected by recombination**

368 To determine the effect of recombination on evolution, it is necessary to understand the  
369 history of recombination which is usually represented by the ancestral recombination  
370 graph (ARG)[21-23]. Because it is impossible to construct an ARG for the huge  
371 collection of SARS-CoV-2 variants, a new method needs to be developed. According  
372 to the finite sites model, which is commonly used to study fast evolving  
373 organisms[24], recombination and recurrent mutation can generate similar genomic  
374 variants (Figure S8). As recombination creates a hybrid genomic structure[25], it can  
375 be distinguished from a recurrent mutation (Figure S12), which affects only the  
376 mutated site. In contrast, a recombination event affects a large part of genome (Figure  
377 S12A).

378  
379

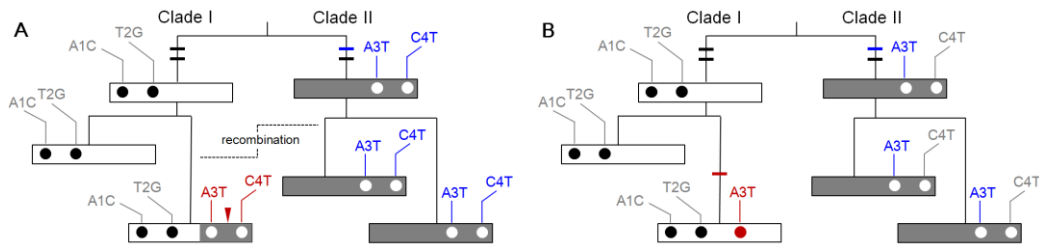

380  
381

382 **Figure S12. Generation of similar genomic variants by recombination and**  
383 **recurrent mutation.**

384 A) Recombination creates a hybrid genomic structure. The region affected by  
385 recombination is indicated with a red arrowhead. Each notch of the branches  
386 represents a mutation. Open and dark gray square strips represent sequences in two  
387 lineages. Solid and empty circles denote mutations. In clade I, mutations A3T and  
388 C4T are observed due to recombination. These two mutations are considered  
389 recurrent if the recombination is ignored because they are also present in clade II.  
390 B) A recurrent mutation A3T, marked in red, occurs in clade I. The same mutation  
391 (marked in blue) also occurs in clade II.

392

393 To identify mutations due to recombination, a flagging procedure is performed in four  
394 steps. First, multiple mutations that occur at the same genomic position, all mutations  
395 are labeled with a recombination flag. Second, mutations are categorized according to  
396 their types. Different mutations are considered as the same type if their ancestral and  
397 derived alleles are the same. Third, for each category, the recombination flag of the  
398 most prevalent mutation is removed because this mutation is unlikely caused by  
399 recombination. The prevalence of a certain mutation corresponds to the number of its  
400 descendants[26] Back mutations are not considered. Forth, if two  
401 recombination-flagged mutations are less than 20 kb apart, their recombination flags  
402 are maintained.

403

#### 404 Identification of mutation cold spots

405 To find mutation cold spots, the mutation density of a genome is denoted as  $\beta$   
406 (mutations per base), and the observed number of mutations within a 10-base window  
407 is denoted as  $\xi_{obs}$ . Under the assumption of homogeneous mutation distribution, the  
408 expected number of mutations within the window is  $10\beta$ . The significant level of  
409 mutation cold spots is determined by Poisson probability[27, 28]:  $P(x \leq \xi_{obs}) =$

410  $\sum_{x \leq \xi_{obs}} e^{-10\beta} (10\beta)^x / x!$ . It is a one-tailed test. Since a deletion may include multiple



411 bases, the number of deleted bases, instead of the number of deletions, is used to  
 412 determine the Poisson probability. If insertions are present, the window is ignored.  
 413 Finally, overlapped windows are merged to form a mutation cold spot.

414  
 415 Among the identified cold spots, those conserved in SARS-CoV-2 but not conserved  
 416 in other coronaviruses were identified. The sequence similarity (window size 100  
 417 bases and sliding step 20 bases) was calculated between SARS-CoV-2  
 418 (NC\_045512)[3] and each of five coronaviruses (Bat-CoV-RaTG13[4],  
 419 Pangolin-CoV[5], Human-SARS-CoV[17], Bat-SARS-CoV1[18], Bat  
 420 SARS-CoV2[19]). If the average sequence similarity of a region is smaller than 70%,  
 421 the region is treated as non-conserved in the coronaviruses.  
 422

### 423 **Detection of on-going selection of SARS-CoV-2**

424 To detect on-going positive selection, allele frequency trajectory with an S-shaped  
 425 curve is examined as described previously[29-32]. For this determination, the  
 426 selection coefficient is denoted as  $s$ . The initial frequency of the derived allele  $a$  is  
 427 denoted as  $q_0$ , and that of the wide-type allele  $A$  is  $p_0 = 1 - q_0$ . The frequency of  
 428 the wild-type allele  $A$  at a specific day (time  $t$ ) is  $p_t$ , and that of the derived allele  $a$  is  
 429  $q_t$ .

430

431 The following equation was used to calculate the coefficient of on-going positive  
 432 selection[29] (Table S3):

$$433 \frac{q_t}{p_t} = (1 + s) \frac{q_{t-1}}{p_{t-1}} = \dots = (1 + s)^t \frac{q_0}{p_0}. \quad (1)$$

434 Then

$$435 \log\left(\frac{q_t}{p_t}\right) = \log\left(\frac{q_0}{p_0}\right) + t \log(1 + s). \quad (2)$$

436 Since  $t$  is known,  $\log(1 + s)$  can be estimated by linear regression.

437

438 **Table S3. Frequency of wild type and derived alleles after selection.**

| Haplotype                          | $A$ (wild type)                      | $a$ (derived allele)                        |
|------------------------------------|--------------------------------------|---------------------------------------------|
| Fitness                            | 1                                    | $1 + s$                                     |
| Frequency at the $(t - 1)$ -th day | $p_{t-1}$                            | $q_{t-1}$                                   |
| Frequency at the $t$ -th day       | $p_t = \frac{p_i}{p_i + (1 + s)q_i}$ | $q_t = \frac{(1 + s)q_i}{p_i + (1 + s)q_i}$ |

439

440 As shown in Figure S13, the best time window to control the transmission of a strain  
 441 with an advantageous mutation is shadowed. When  $s > 0$ , the frequency of a derived  
 442 allele increases over time[29]. During Stages I and III, the speed of increase in the

443 frequency of advantageous allele is slow, indicating low selection efficiency. During  
444 Stage II, the speed of increase in the frequency of advantageous allele is fast, and the  
445 efficiency of selection is high. When the frequency is 50%, the efficiency of selection  
446 reaches maximum. Therefore, the best time window to control the transmission of  
447 strains with an advantageous mutation is that of Stage I, especially when its frequency  
448 is still below 10%.

449

450 The analysis framework for detecting strains with putative advantageous mutations  
451 during their early stage of spreading is summarized in Figure S14. A neutral mutation  
452 may be linked to an advantageous mutation and spread over the entire population[21,  
453 22, 33]. To reduce the impact of hitchhiking by neutral mutation, only  
454 non-synonymous mutations were analyzed. For this analysis, the initial (start)  
455 frequency must be  $< 0.1$ , and the end frequency must be  $> 0.05$ . Only the mutation  
456 frequency trajectory during the selective phase was used for calculation as this is the  
457 period when an advantageous mutation causes on-going selection. Linear regression  
458 analysis was performed to detect advantageous mutation. According to the equation  
459 described above, a mutation was considered advantageous when  $s > 0$ ,  $p < 0.01$ ,  
460 and  $R^2 > 0.5$ .

461

462

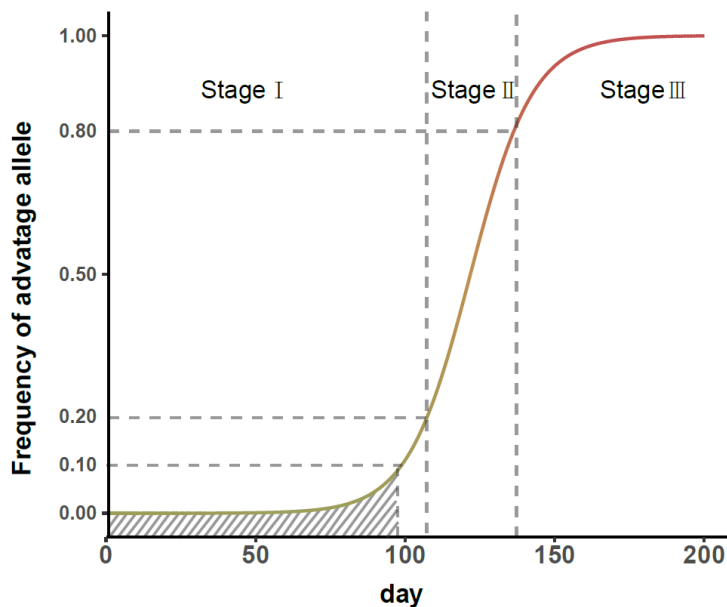

463

464 **Figure S13. S-shaped frequency trajectory of advantageous mutations.  $s = 0.1$**

465 and  $q_0 = 0.0001$ .

466

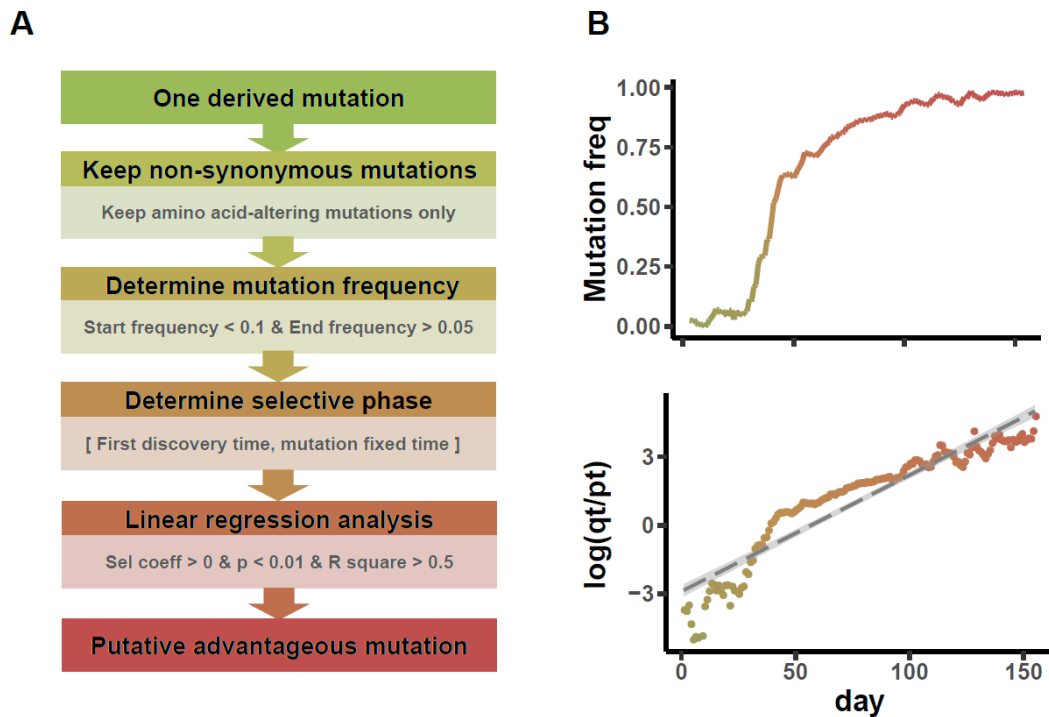

467

468 **Figure S14. Detection of on-going selection of SARS-CoV-2.**

469 **A)** Flow chart for detection of putative advantageous variants.

470 **B)** Frequency trajectory for A23403G (S: D614G) and linear regression analysis. The  
 471  $x$ -axis displays number of days since the first appearance of a derived allele in global  
 472 virus population.  $q_t$  is the frequency of the derived allele (23403G), and  $p_t$  is the  
 473 frequency of the ancestral allele (23403A) at time  $t$ .

474

**Table S4. Putative advantageous mutations in the spike protein.<sup>¶</sup>**

| Position | Nucl. mut.   | AA mut. | Start time | Start freq | End/Last time | End/Last freq | Sel Coeff | P-value  | R-square |
|----------|--------------|---------|------------|------------|---------------|---------------|-----------|----------|----------|
| 21765*   | TACATG21765- | HV69-   | 2020/3/26  | 0.0003     | 2021/5/28     | 0.4439        | 0.0265    | <1.0E-10 | 0.9291   |
| 21991*   | TTA21991-    | Y144-   | 2020/2/16  | 0.0068     | 2021/5/28     | 0.432         | 0.0238    | <1.0E-10 | 0.7969   |
| 22917    | T22917G      | L452R   | 2020/3/15  | 0.0002     | 2021/5/28     | 0.5408        | 0.0175    | <1.0E-10 | 0.8314   |
| 22995    | C22995A      | T478K   | 2020/4/26  | 0.0004     | 2021/5/28     | 0.5357        | 0.02      | <1.0E-10 | 0.7645   |
| 23063*   | A23063T      | N501Y   | 2020/3/28  | 0.0002     | 2021/5/28     | 0.449         | 0.0305    | <1.0E-10 | 0.8757   |
| 23271*   | C23271A      | A570D   | 2020/4/25  | 0.0004     | 2021/5/28     | 0.4388        | 0.0362    | <1.0E-10 | 0.7822   |
| 23403    | A23403G      | D614G   | 2020/1/17  | 0.0263     | 2020/7/21     | 0.9913        | 0.046     | <1.0E-10 | 0.8667   |
| 23604*   | C23604A      | P681H   | 2020/3/25  | 0.001      | 2021/5/28     | 0.4405        | 0.0271    | <1.0E-10 | 0.9173   |
| 23604    | C23604G      | P681R   | 2020/6/26  | 0.003      | 2021/5/28     | 0.5374        | 0.0183    | <1.0E-10 | 0.697    |
| 23709*   | C23709T      | T716I   | 2020/3/25  | 0.0002     | 2021/5/28     | 0.4388        | 0.0282    | <1.0E-10 | 0.8519   |
| 24506*   | T24506G      | S982A   | 2020/9/18  | 0.0004     | 2021/5/28     | 0.4388        | 0.0377    | <1.0E-10 | 0.7789   |
| 24914*   | G24914C      | D1118H  | 2020/3/31  | 0.0002     | 2021/5/28     | 0.4388        | 0.0355    | <1.0E-10 | 0.7964   |

<sup>¶</sup>The analysis was performed on global samples ( $n = 1,002,739$ ).

\*Mutations found on the clade CGB84017.91425 (B.1.1.7).

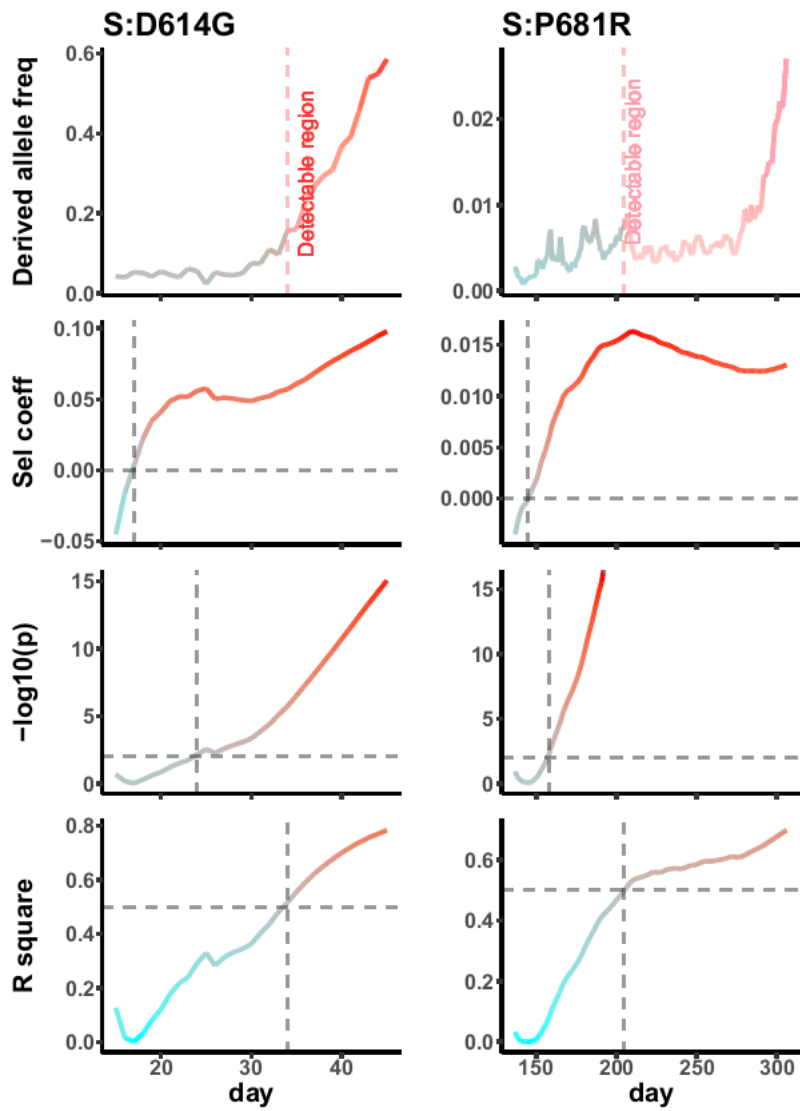

**Figure S15. Putative advantageous variants of SARS-CoV-2.** The x-axis displays number of days since the first appearance of derived allele in the global viral population. Predicted adaptation is marked in pink. Dashed gray crossings denote top right corners with a positive selection coefficient,  $p < 0.01$ , and  $R^2 > 50\%$ .

## References

1. Zhao W-M, Song S-H, Chen M-L et al. The 2019 novel coronavirus resource, *Hereditas (Beijing)* 2020;42:212-221.
2. Rozewicki J, Li S, Amada KM et al. MAFFT-DASH: integrated protein sequence and structural alignment, *Nucleic Acids Res* 2019;47:W5-W10.
3. Wu F, Zhao S, Yu B et al. A new coronavirus associated with human respiratory disease in China, *Nature* 2020;579:265-269.
4. Zhou P, Yang X-L, Wang X-G et al. A pneumonia outbreak associated with a new coronavirus of probable bat origin, *Nature* 2020;579:270-273.
5. Lam TT-Y, Jia N, Zhang Y-W et al. Identifying SARS-CoV-2-related coronaviruses in Malayan pangolins, *Nature* 2020;583:282-285.
6. Bedford T, Greninger AL, Roychoudhury P et al. Cryptic transmission of SARS-CoV-2 in Washington state, *Science* 2020;370:571-575.
7. Price MN, Dehal PS, Arkin AP. FastTree 2-Approximately maximum-likelihood trees for large alignments, *Plos One* 2010;5:e9490.
8. Kozlov AM, Darriba D, Flouri T et al. RAxML-NG: a fast, scalable and user-friendly tool for maximum likelihood phylogenetic inference, *Bioinformatics* 2019;35:4453-4455.
9. Saitou N, Nei M. The neighbor-joining method: a new method for reconstructing phylogenetic trees, *Mol Biol Evol* 1987;4:406-425.
10. Li H, Zhang YW, Zhang YP et al. Neutrality tests using DNA polymorphism from multiple samples, *Genetics* 2003;163:1147-1151.
11. Sankoff D. Minimal mutation trees of sequences., *SIAM J Appl Math* 1975;28:35-42.
12. Hartigan JA. Minimum mutation fits to a given tree, *Biometrics* 1973;29:53-65.
13. McCarthy KR, Rennick LJ, Nambulli S et al. Recurrent deletions in the SARS-CoV-2 spike glycoprotein drive antibody escape, *Science* 2021:eabf6950.
14. Sagulenko P, Puller V, Neher RA. TreeTime: Maximum-likelihood phylodynamic analysis, *Virus Evol* 2018;4:vex042.
15. White WTJ, Holland BR. Faster exact maximum parsimony search with XMP, *Bioinformatics* 2011;27:1359-1367.
16. Hendy MD, Penny D. Branch and bound algorithms to determine minimal evolutionary trees, *Math Biosci* 1982;59:277-290.
17. Qin E, Zhu QY, Yu M et al. A complete sequence and comparative analysis of a SARS-associated virus (Isolate BJ01), *Chin Sci Bull* 2003;48:941-948.
18. Hu B, Zeng L-P, Yang X-L et al. Discovery of a rich gene pool of bat SARS-related coronaviruses provides new insights into the origin of SARS coronavirus, *PLoS Pathog* 2017;13:e1006698.

19. Han YL, Du J, Su HX et al. Identification of diverse bat alphacoronaviruses and betacoronaviruses in China provides new insights into the evolution and origin of coronavirus-related diseases, *Front Microbiol* 2019;10:1900.
20. Li H, Stephan W. Inferring the demographic history and rate of adaptive substitution in *Drosophila*., *PLoS Genet.* 2006;2:e166.
21. Kim Y, Stephan W. Detecting a local signature of genetic hitchhiking along a recombining chromosome., *Genetics* 2002;160:765-777.
22. Li H, Stephan W. Maximum likelihood methods for detecting recent positive selection and localizing the selected site in the genome., *Genetics* 2005;171:377-384.
23. Bouckaert R, Vaughan TG, Barido-Sottani J et al. BEAST 2.5: An advanced software platform for Bayesian evolutionary analysis, *PLoS Comput Biol* 2019;15.
24. Gao F, Ming C, Hu WJ et al. New software for the fast estimation of population recombination rates (FastEPRR) in the genomic era, *G3* 2016;6:1563-1571.
25. Lam HM, Ratmann O, Boni MF. Improved algorithmic complexity for the 3SEQ recombination detection algorithm, *Mol Biol Evol* 2018;35:247-251.
26. Fu Y-X. Statistical properties of segregating sites., *Theor Popul Biol* 1995;48:172-197.
27. Ohta T, Kimura M. On the constancy of the evolutionary rate in cistrons, *J Mol Evol* 1971;1:18-25.
28. Wang Y, Dai G, Gu Z et al. Accelerated evolution of an *Lhx2* enhancer shapes mammalian social hierarchies, *Cell Res* 2020;30:408-420.
29. Hartl DL, Clark AG. *Principles of Population Genetics*. Sunderland, Massachusetts: Sinauer Associates, Inc., 1988.
30. Li J, Schneider KA, Li H. The hitchhiking effect of a strongly selected substitution in male germline on neutral polymorphism in a monogamy population, *Plos One* 2013;8:e71497.
31. Stephan W, Wiehe THE, Lenz MW. The effect of strongly selected substitutions on neutral polymorphism: analytical results based on diffusion theory., *Theor. Popul. Biol.* 1992;41:237-254.
32. Schraiber JG, Evans SN, Slatkin M. Bayesian inference of natural selection from allele frequency time series, *Genetics* 2016;203:493-511.
33. Kaplan NL, Hudson RR, Langley CH. The "hitchhiking effect" revisited., *Genetics* 1989;123:887-899.
